# Supplementary material for: Multiple Origins and Specific Evolution of CRISPR/Cas9 Systems in Minimal Bacteria (Mollicutes)
Source: Front Microbiol. 2019 Nov 21;10:2701. doi: 10.3389/fmicb.2019.02701 (PMC6882279; doi:10.3389/fmicb.2019.02701)
Supplement: Supplementary file 10 [file Table_2.xlsx]

## Sheet: Table S2
Table S2. CDS used for the construction of the phylogenetic tree of mollicutes. For each of the 52 selected genomes, CDS are indicated by their mnemonics (locus tag).
			genome ID	RPLA	RPLB	RPLC	RPLD	RPLE	RPLF	RPLJ	RPLK	RPLL	RPLM	RPLN	RPLO	RPLP	RPLQ	RPLR	RPLT	RPLX	RPMB	RPMF	RPMI	RPSC	RPSD	RPSE	RPSF	RPSG	RPSH	RPSI	RPSJ	RPSK	RPSL	RPSM	RPSO	RPSQ	RPSS	RPST	ALARS	ASNRS	CYSRS	GLTX	HISRS	ILERS	LEURS	METRS	PHES	TRPRS	TYRRS
		B. subtilis str. 168	NC_000964.3	Bsub_NP_387984.2	Bsub_NP_388000.2	Bsub_NP_387997.1	Bsub_NP_387998.1	Bsub_NP_388009.1	Bsub_NP_388012.1	Bsub_NP_387985.2	Bsub_NP_387983.2	Bsub_NP_387986.1	Bsub_NP_388030.2	Bsub_NP_388007.1	Bsub_NP_388016.1	Bsub_NP_388004.1	Bsub_NP_388025.1	Bsub_NP_388013.2	Bsub_NP_390763.1	Bsub_NP_388008.1	Bsub_NP_389464.1	Bsub_NP_389391.1	Bsub_NP_390764.1	Bsub_NP_388003.2	Bsub_NP_390844.1	Bsub_NP_388014.1	Bsub_NP_391971.1	Bsub_NP_387992.2	Bsub_NP_388011.2	Bsub_NP_388031.1	Bsub_NP_387996.1	Bsub_NP_388023.1	Bsub_NP_387991.2	Bsub_NP_388022.2	Bsub_NP_389550.1	Bsub_NP_388006.1	Bsub_NP_388001.1	Bsub_NP_390433.2	Bsub_NP_390618.1	Bsub_NP_390117.1	Bsub_NP_387975.1	Bsub_NP_387973.1	Bsub_NP_390634.1	Bsub_NP_389426.2	Bsub_NP_390910.1	Bsub_NP_387919.1	Bsub_NP_390742.1	Bsub_NP_389024.1	Bsub_NP_391725.1
	spiroplasma	Mycoplasma capricolum subsp. capripneumoniae 99108-P1	GCA_000731685.1	Mccp_s01_5850	Mccp_s01_1450	Mccp_s01_1420	Mccp_s01_1430	Mccp_s01_1540	Mccp_s01_1570	Mccp_s01_5860	Mccp_s01_5840	Mccp_s01_5870	Mccp_s01_1740	Mccp_s01_1520	Mccp_s01_1600	Mccp_s01_1490	Mccp_s01_1680	Mccp_s01_1580	Mccp_s01_7360	Mccp_s01_1530	Mccp_s01_3540	Mccp_s01_4520	Mccp_s01_7370	Mccp_s01_1480	Mccp_s01_7730	Mccp_s01_1590	Mccp_s01_5310	Mccp_s01_6740	Mccp_s01_1560	Mccp_s01_1750	Mccp_s01_1410	Mccp_s01_1660	Mccp_s01_6730	Mccp_s01_1650	Mccp_s01_8800	Mccp_s01_1510	Mccp_s01_1460	Mccp_s01_0140	Mccp_s04_0010	Mccp_s01_0080	Mccp_s01_6290	Mccp_s01_6530	Mccp_s01_8730	Mccp_s01_4420	Mccp_s01_1780	Mccp_s01_5430	Mccp_s01_4550	Mccp_s01_8920	Mccp_s01_2000
		Mycoplasma capricolum subsp. capricolum ATCC 27343	NC_007633.1	MCAP0066	MCAP0693	MCAP0696	MCAP0695	MCAP0684	MCAP0681	MCAP0067	MCAP0065	MCAP0068	MCAP0663	MCAP0686	MCAP0678	MCAP0689	MCAP0669	MCAP0680	MCAP0203	MCAP0685	MCAP0488	MCAP0386	MCAP0204	MCAP0690	MCAP0237	MCAP0679	MCAP0024	MCAP0152	MCAP0682	MCAP0662	MCAP0697	MCAP0671	MCAP0151	MCAP0672	MCAP0330	MCAP0687	MCAP0692	MCAP0818	MCAP0159	MCAP0824	MCAP0110	MCAP0130	MCAP0324	MCAP0393	MCAP0659	MCAP0035	MCAP0383	MCAP0342	MCAP0639
		Mycoplasma leachii PG50	NC_014751.1	MSB_A0107	MSB_A0711	MSB_A0714	MSB_A0713	MSB_A0702	MSB_A0699	MSB_A0115	MSB_A0106	MSB_A0116	MSB_A0681	MSB_A0704	MSB_A0696	MSB_A0707	MSB_A0687	MSB_A0698	MSB_A0245	MSB_A0703	MSB_A0501	MSB_A0400	MSB_A0246	MSB_A0708	MSB_A0286	MSB_A0697	MSB_A0030	MSB_A0202	MSB_A0700	MSB_A0680	MSB_A0715	MSB_A0689	MSB_A0201	MSB_A0690	MSB_A0344	MSB_A0705	MSB_A0710	MSB_A0863	MSB_A0210	MSB_A0869	MSB_A0154	MSB_A0178	MSB_A0338	MSB_A0407	MSB_A0676	MSB_A0075	MSB_A0397	MSB_A0356	MSB_A0654
		Mycoplasma mycoides subsp. mycoides SC PG1	NC_005364.2	MSC_0995	MSC_0742	MSC_0745	MSC_0744	MSC_0732	MSC_0730	MSC_1006	MSC_0994	MSC_1007	MSC_0713	MSC_0735	MSC_0727	MSC_0738	MSC_0720	MSC_0729	MSC_0223	MSC_0734	MSC_0483	MSC_0593	MSC_0222	MSC_0739	MSC_0278	MSC_0728	MSC_0027	MSC_0158	MSC_0731	MSC_0712	MSC_0746	MSC_0722	MSC_0157	MSC_0723	MSC_0347	MSC_0736	MSC_0741	MSC_0086	MSC_0178	MSC_0080	MSC_0959	MSC_0131	MSC_0334	MSC_0585	MSC_0709	MSC_0012	MSC_0596	MSC_0358	MSC_0686
		Mycoplasma mycoides subsp. capri 95010	NC_015431.1	MLC_8150	MLC_6920	MLC_6950	MLC_6940	MLC_6840	MLC_6810	MLC_8140	MLC_8160	MLC_8130	MLC_6640	MLC_6860	MLC_6780	MLC_6890	MLC_6700	MLC_6800	MLC_1950	MLC_6850	MLC_4630	MLC_5600	MLC_1960	MLC_6900	MLC_2600	MLC_6790	MLC_0240	MLC_1410	MLC_6820	MLC_6630	MLC_6960	MLC_6720	MLC_1400	MLC_6730	MLC_3290	MLC_6870	MLC_6915	MLC_0730	MLC_1550	MLC_0670	MLC_8320	MLC_1180	MLC_3230	MLC_5530	MLC_6610	MLC_0120	MLC_5630	MLC_3400	MLC_6440
		Mycoplasma feriruminatoris G5847	NZ_ANFU00000000.1	D500_0287	D500_0067	D500_0070	D500_0069	D500_0058	D500_0055	D500_0288	D500_0286	D500_0289	D500_0036	D500_0060	D500_0052	D500_0063	D500_0043	D500_0054	D500_0569	D500_0059	D500_0677	D500_0216	D500_0568	D500_0064	D500_0534	D500_0053	D500_0162	D500_0017	D500_0056	D500_0035	D500_0071	D500_0045	D500_0016	D500_0046	D500_0876	D500_0061	D500_0066	D500_0234	D500_0118	D500_0228	D500_0321	D500_0350	D500_0870	D500_0209	D500_0032	D500_0455	D500_0219	D500_0892	D500_0746
		Mycoplasma yeatsii 13926	GCA_000380285.1	Myea_s02_3010	Myea_s02_4710	Myea_s02_4680	Myea_s02_4690	Myea_s02_4770	Myea_s02_4800	Myea_s02_2970	Myea_s02_3020	Myea_s02_2960	Myea_s02_4990	Myea_s02_4763	Myea_s02_4830	Myea_s02_4750	Myea_s02_4915	Myea_s02_4810	Myea_s02_0080	Myea_s02_4765	Myea_s02_6270	Myea_s02_2175	Myea_s02_0070	Myea_s02_4740	Myea_s02_5230	Myea_s02_4820	Myea_s02_3130	Myea_s02_3180	Myea_s02_4790	Myea_s02_5000	Myea_s02_4670	Myea_s02_4900	Myea_s02_3190	Myea_s02_4890	Myea_s02_0440	Myea_s02_4761	Myea_s02_4720	Myea_s02_1730	Myea_s02_3300	Myea_s02_2540	Myea_s02_3060	Myea_s02_4230	Myea_s02_0290	Myea_s02_6630	Myea_s02_5020	Myea_s02_3390	Myea_s02_2200	Myea_s02_0110	Myea_s02_5200
		Mycoplasma putrefaciens 9231	NC_021083.1	MPUT6810	MPUT6010	MPUT6040	MPUT6030	MPUT5920	MPUT5890	MPUT6790	MPUT6820	MPUT6780	MPUT5720	MPUT5940	MPUT5860	MPUT5970	MPUT5770	MPUT5880	MPUT1770	MPUT5930	MPUT5220	MPUT4650	MPUT1760	MPUT5980	MPUT5510	MPUT5870	MPUT6940	MPUT0550	MPUT5900	MPUT5710	MPUT6050	MPUT5790	MPUT0540	MPUT5800	MPUT3350	MPUT5950	MPUT6000	MPUT3050	MPUT0730	MPUT0890	MPUT6870	MPUT0370	MPUT2810	MPUT3630	MPUT5690	MPUT7020	MPUT4680	MPUT1820	MPUT5520
		Mesoplasma florum L1	NC_006055.1	Mfl608	Mfl126	Mfl123	Mfl124	Mfl135	Mfl138	Mfl602	Mfl609	Mfl601	Mfl493	Mfl133	Mfl141	Mfl130	Mfl151	Mfl139	Mfl190	Mfl134	Mfl227	Mfl396	Mfl189	Mfl129	Mfl586	Mfl140	Mfl080	Mfl623	Mfl137	Mfl492	Mfl122	Mfl149	Mfl624	Mfl148	Mfl284	Mfl132	Mfl127	Mfl368.1	Mfl613	Mfl480	Mfl087	Mfl651	Mfl366	Mfl389	Mfl490	Mfl036	Mfl399	Mfl192	Mfl587
		Spiroplasma apis B31	NC_022998	SAPIS_RS00185	SAPIS_RS04750	SAPIS_RS04765	SAPIS_RS04760	SAPIS_RS04705	SAPIS_RS04690	SAPIS_RS00190	SAPIS_RS00180	SAPIS_RS00195	SAPIS_RS04590	SAPIS_RS04715	SAPIS_RS04675	SAPIS_RS04730	SAPIS_RS04630	SAPIS_RS04685	SAPIS_RS01230	SAPIS_RS04710	SAPIS_RS04275	SAPIS_RS03865	SAPIS_RS01225	SAPIS_RS04735	SAPIS_RS04420	SAPIS_RS04680	SAPIS_RS00105	SAPIS_RS04870	SAPIS_RS04695	SAPIS_RS04585	SAPIS_RS04770	SAPIS_RS04640	SAPIS_RS04875	SAPIS_RS04645	SAPIS_RS02080	SAPIS_RS04720	SAPIS_RS04745	SAPIS_RS03080	SAPIS_RS04805	SAPIS_RS00450	SAPIS_RS00150	SAPIS_RS04970	SAPIS_RS02415	SAPIS_RS03760	SAPIS_RS00700	SAPIS_RS05015	SAPIS_RS03880	SAPIS_RS01250	SAPIS_RS04445
		Spiroplasma helicoides TABS-2	GCA_001715535.1	SHELI_RS00200	SHELI_RS04470	SHELI_RS04485	SHELI_RS04480	SHELI_RS04425	SHELI_RS04410	SHELI_RS00235	SHELI_RS00195	SHELI_RS00240	SHELI_RS04280	SHELI_RS04435	SHELI_RS04395	SHELI_RS04450	SHELI_RS04350	SHELI_RS04405	SHELI_RS01120	SHELI_RS04430	SHELI_RS03935	SHELI_RS03690	SHELI_RS01115	SHELI_RS04455	SHELI_RS04105	SHELI_RS04400	SHELI_RS00110	SHELI_RS05525	SHELI_RS04415	SHELI_RS04275	SHELI_RS04490	SHELI_RS04360	SHELI_RS05530	SHELI_RS04365	SHELI_RS01855	SHELI_RS04440	SHELI_RS04465	SHELI_RS02820	SHELI_RS05410	SHELI_RS00515	SHELI_RS00155	SHELI_RS05690	SHELI_RS02635	SHELI_RS03615	SHELI_RS00815	SHELI_RS05750	SHELI_RS03705	SHELI_RS01135	SHELI_RS04130
		Spiroplasma taiwanense CT-1	NC_021846.1	STAIW_RS00180	STAIW_RS05045	STAIW_RS05060	STAIW_RS05055	STAIW_RS05000	STAIW_RS04985	STAIW_RS00210	STAIW_RS00175	STAIW_RS00215	STAIW_RS04895	STAIW_RS05010	STAIW_RS04970	STAIW_RS05025	STAIW_RS04925	STAIW_RS04980	STAIW_RS01230	STAIW_RS05005	STAIW_RS04570	STAIW_RS04335	STAIW_RS01225	STAIW_RS05030	STAIW_RS04735	STAIW_RS04975	STAIW_RS00100	STAIW_RS05170	STAIW_RS04990	STAIW_RS04890	STAIW_RS05065	STAIW_RS04935	STAIW_RS05175	STAIW_RS04940	STAIW_RS01920	STAIW_RS05015	STAIW_RS05040	STAIW_RS02875	STAIW_RS05100	STAIW_RS00480	STAIW_RS00145	STAIW_RS05275	STAIW_RS02135	STAIW_RS04175	STAIW_RS00885	STAIW_RS05335	STAIW_RS04350	STAIW_RS01240	STAIW_RS04765
		Spiroplasma litorale TN-1	NZ_CP012357.1	SLITO_RS00200	SLITO_RS05135	SLITO_RS05150	SLITO_RS05145	SLITO_RS05090	SLITO_RS05075	SLITO_RS00205	SLITO_RS00195	SLITO_RS00210	SLITO_RS00765	SLITO_RS05100	SLITO_RS05060	SLITO_RS05115	SLITO_RS05015	SLITO_RS05070	SLITO_RS04555	SLITO_RS05095	SLITO_RS01060	SLITO_RS01355	SLITO_RS04560	SLITO_RS05120	SLITO_RS00895	SLITO_RS05065	SLITO_RS00110	SLITO_RS05310	SLITO_RS05080	SLITO_RS00770	SLITO_RS05155	SLITO_RS05025	SLITO_RS05315	SLITO_RS05030	SLITO_RS01900	SLITO_RS05105	SLITO_RS05130	SLITO_RS02525	SLITO_RS05165	SLITO_RS00430	SLITO_RS00160	SLITO_RS05505	SLITO_RS02055	SLITO_RS01445	SLITO_RS04905	SLITO_RS05585	SLITO_RS01340	SLITO_RS04545	SLITO_RS00880
		Spiroplasma syrphidicola EA-1	NC_021284.1	SSYRP_RS04795	SSYRP_RS01095	SSYRP_RS01080	SSYRP_RS01085	SSYRP_RS01140	SSYRP_RS01155	SSYRP_RS05000	SSYRP_RS04800	SSYRP_RS04995	SSYRP_RS04925	SSYRP_RS01130	SSYRP_RS01170	SSYRP_RS01115	SSYRP_RS01210	SSYRP_RS01160	SSYRP_RS03220	SSYRP_RS01135	SSYRP_RS04075	SSYRP_RS03390	SSYRP_RS03225	SSYRP_RS01110	SSYRP_RS03995	SSYRP_RS01165	SSYRP_RS00120	SSYRP_RS00360	SSYRP_RS01150	SSYRP_RS04920	SSYRP_RS01075	SSYRP_RS01200	SSYRP_RS00355	SSYRP_RS01195	SSYRP_RS03080	SSYRP_RS01125	SSYRP_RS01100	SSYRP_RS00675	SSYRP_RS02945	SSYRP_RS01265	SSYRP_RS00830	SSYRP_RS00900	SSYRP_RS02485	SSYRP_RS03350	SSYRP_RS04280	SSYRP_RS00820	SSYRP_RS03410	SSYRP_RS03940	SSYRP_RS04570
		Spiroplasma citri G II-3	AM285301-AM285339	SPICI20_046	SPICI03_105	SPICI03_102	SPICI03_103	SPICI03_114	SPICI03_117	SPICI01A_019	SPICI20_047	SPICI01A_018	SPICI20_074	SPICI03_112	SPICI03_120	SPICI03_109	SPICI03_128	SPICI03_118	SPICI04_013	SPICI03_113	SPICI16_036	SPICI04_119	SPICI04_012	SPICI03_108	SPICI16_022	SPICI03_119	SPICI01B_021	SPICI01B_076	SPICI03_116	SPICI20_073	SPICI03_101	SPICI03_126	SPICI01B_075	SPICI03_125	SPICI04_045	SPICI03_111	SPICI03_106	SPICI02_055	SPICI10_039	SPICI03_142	SPICI03_047	SPICI03_065	SPICI06_033	SPICI04_127	SPICI18_028	SPICI03_045	SPICI04_115	SPICI16_006	SPICI01B_135
		Spiroplasma mirum ATCC 29335	NZ_CP002082.1	SMM_RS05250	SMM_RS01300	SMM_RS01285	SMM_RS01290	SMM_RS01345	SMM_RS01360	SMM_RS05550	SMM_RS05255	SMM_RS05545	SMM_RS05410	SMM_RS01335	SMM_RS01375	SMM_RS01320	SMM_RS01415	SMM_RS01365	SMM_RS03245	SMM_RS01340	SMM_RS04575	SMM_RS03405	SMM_RS03250	SMM_RS01315	SMM_RS04460	SMM_RS01370	SMM_RS00155	SMM_RS00300	SMM_RS01355	SMM_RS05405	SMM_RS01280	SMM_RS01405	SMM_RS00295	SMM_RS01400	SMM_RS03535	SMM_RS01330	SMM_RS01305	SMM_RS00630	SMM_RS02400	SMM_RS01495	SMM_RS00900	SMM_RS01025	SMM_RS02610	SMM_RS03365	SMM_RS00845	SMM_RS00890	SMM_RS03445	SMM_RS04390	SMM_RS05010
	hominis	Mycoplasma bovigenitalium 51080	NZ_AORH00000000.1	Mbvg_s01_4870	Mbvg_s01_7080	Mbvg_s01_7050	Mbvg_s01_7060	Mbvg_s01_7170	Mbvg_s01_7200	Mbvg_s01_3110	Mbvg_s01_4880	Mbvg_s01_3100	Mbvg_s01_3170	Mbvg_s01_7150	Mbvg_s01_7230	Mbvg_s01_7120	Mbvg_s01_1820	Mbvg_s01_7210	Mbvg_s01_1440	Mbvg_s01_7160	Mbvg_s01_5530	Mbvg_s01_5795	Mbvg_s01_1430	Mbvg_s01_7110	Mbvg_s01_5930	Mbvg_s01_7220	Mbvg_s01_0310	Mbvg_s01_5370	Mbvg_s01_7190	Mbvg_s01_3180	Mbvg_s01_7040	Mbvg_s01_1840	Mbvg_s01_5365	Mbvg_s01_1850	Mbvg_s01_6540	Mbvg_s01_7140	Mbvg_s01_7090	Mbvg_s01_2810	Mbvg_s01_1020	Mbvg_s01_2120	Mbvg_s01_4200	Mbvg_s01_5870	Mbvg_s01_6140	Mbvg_s01_5750	Mbvg_s01_2010	Mbvg_s01_5170	Mbvg_s01_1500	Mbvg_s01_1970	Mbvg_s01_4110
		Mycoplasma bovis PG45	NC_014760.1	MBOVPG45_0091	MBOVPG45_0265	MBOVPG45_0262	MBOVPG45_0263	MBOVPG45_0274	MBOVPG45_0277	MBOVPG45_0715	MBOVPG45_0090	MBOVPG45_0714	MBOVPG45_0362	MBOVPG45_0272	MBOVPG45_0280	MBOVPG45_0269	MBOVPG45_0294	MBOVPG45_0278	MBOVPG45_0338	MBOVPG45_0273	MBOVPG45_0109	MBOVPG45_0138	MBOVPG45_0339	MBOVPG45_0268	MBOVPG45_0246	MBOVPG45_0279	MBOVPG45_0541	MBOVPG45_0692	MBOVPG45_0276	MBOVPG45_0361	MBOVPG45_0261	MBOVPG45_0292	MBOVPG45_0693	MBOVPG45_0291	MBOVPG45_0591	MBOVPG45_0271	MBOVPG45_0266	MBOVPG45_0648	MBOVPG45_0506	MBOVPG45_0391	MBOVPG45_0041	MBOVPG45_0230	MBOVPG45_0532	MBOVPG45_0605	MBOVPG45_0453	MBOVPG45_0636	MBOVPG45_0076	MBOVPG45_0434	MBOVPG45_0844
		Mycoplasma agalactiae PG2	NC_009497.1	MAG0810	MAG5430	MAG5460	MAG5450	MAG5350	MAG5320	MAG6190	MAG0800	MAG6180	MAG4550	MAG5370	MAG5290	MAG5390	MAG5190	MAG5310	MAG4770	MAG5360	MAG0970	MAG1290	MAG4760	MAG5400	MAG5610	MAG5300	MAG2760	MAG5930	MAG5330	MAG4560	MAG5470	MAG5210	MAG5940	MAG5220	MAG2290	MAG5380	MAG5420	MAG1950	MAG4160	MAG3020	MAG0400	MAG5780	MAG4500	MAG2200	MAG3640	MAG2060	MAG0670	MAG3430	MAG7300
		Mycoplasma fermentans JER	NC_014552.1	MFE_08610	MFE_05550	MFE_05580	MFE_05570	MFE_05460	MFE_05430	MFE_06500	MFE_08600	MFE_06490	MFE_01560	MFE_05480	MFE_05400	MFE_05510	MFE_06190	MFE_05420	MFE_03290	MFE_05470	MFE_07400	MFE_06320	MFE_03285	MFE_05520	MFE_03200	MFE_05410	MFE_02610	MFE_06410	MFE_05440	MFE_01570	MFE_05590	MFE_06210	MFE_06400	MFE_06220	MFE_06390	MFE_05490	MFE_05540	MFE_07590	MFE_04090	MFE_04430	MFE_07630	MFE_05740	MFE_05810	MFE_06750	MFE_03730	MFE_07300	MFE_01050	MFE_03890	MFE_00090
		Mycoplasma lipofaciens ATCC 35015	NZ_JMKY01000006.1	T388_RS0101075	T388_RS0100690	T388_RS0100675	T388_RS0100680	T388_RS0100735	T388_RS0100750	T388_RS0101605	T388_RS0101080	T388_RS0101610	T388_RS0102675	T388_RS0100725	T388_RS0100765	T388_RS0100710	T388_RS0102145	T388_RS0100755	T388_RS0101690	T388_RS0100730	T388_RS0103090	T388_RS0103305	T388_RS0101695	T388_RS0100705	T388_RS0100085	T388_RS0100760	T388_RS0102865	T388_RS0103460	T388_RS0100745	T388_RS0102680	T388_RS0100670	T388_RS0102155	T388_RS0103455	T388_RS0102160	T388_RS0102725	T388_RS0100720	T388_RS0100695	T388_RS0102450	T388_RS0101935	T388_RS0101835	T388_RS0101085	T388_RS0102790	T388_RS0102805	T388_RS0100060	T388_RS0100850	T388_RS0103155	T388_RS0100225	T388_RS0100825	T388_RS0101295
		Mycoplasma gallinarum Mgn_IPT	NZ_JHZE00000000.1	MGALLINA_05130	MGALLINA_01840	MGALLINA_01810	MGALLINA_01820	MGALLINA_01930	MGALLINA_01960	MGALLINA_01450	MGALLINA_05120	MGALLINA_01460	MGALLINA_04580	MGALLINA_01910	MGALLINA_03600	MGALLINA_01880	MGALLINA_06090	MGALLINA_01970	MGALLINA_04240	MGALLINA_01920	MGALLINA_04650	MGALLINA_03690	MGALLINA_04250	MGALLINA_01870	MGALLINA_05520	MGALLINA_01980	MGALLINA_04360	MGALLINA_04490	MGALLINA_01950	MGALLINA_04590	MGALLINA_01800	MGALLINA_06110	MGALLINA_04480	MGALLINA_06120	MGALLINA_03080	MGALLINA_01900	MGALLINA_01850	MGALLINA_00860	MGALLINA_05240	MGALLINA_02430	MGALLINA_04820	MGALLINA_05480	MGALLINA_00810	MGALLINA_00520	MGALLINA_05940	MGALLINA_02750	MGALLINA_01680	MGALLINA_05890	MGALLINA_02560
		Mycoplasma crocodyli MP145	NC_014014.1	MCRO_0594	MCRO_0128	MCRO_0125	MCRO_0126	MCRO_0138	MCRO_0141	MCRO_0330a	MCRO_0595	MCRO_0330	MCRO_0428	MCRO_0136	MCRO_0144	MCRO_0133	MCRO_0157	MCRO_0142	MCRO_0215	MCRO_0137	MCRO_0653	MCRO_0263	MCRO_0214	MCRO_0132	MCRO_0564	MCRO_0143	MCRO_0449	MCRO_0692	MCRO_0140	MCRO_0427	MCRO_0124	MCRO_0155	MCRO_0693	MCRO_0154	MCRO_0171	MCRO_0135	MCRO_0129	MCRO_0251	MCRO_0217	MCRO_0234	MCRO_0599	MCRO_0522	MCRO_0380	MCRO_0195	MCRO_0226	MCRO_0163	MCRO_0314	MCRO_0383	MCRO_0048
		Mycoplasma synoviae 53	NC_007294	MS53_0623	MS53_0640	MS53_0643	MS53_0642	MS53_0631	MS53_0628	MS53_0420	MS53_0624	MS53_0421	MS53_0076	MS53_0633	MS53_0625	MS53_0636	MS53_0573	MS53_0627	MS53_0608	MS53_0632	MS53_0066	MS53_0163	MS53_0607	MS53_0637	MS53_0478	MS53_0626	MS53_0532	MS53_0048	MS53_0629	MS53_0077	MS53_0644	MS53_0575	MS53_0049	MS53_0576	MS53_0562	MS53_0634	MS53_0639	MS53_0071	MS53_0376	MS53_0422	MS53_0357	MS53_0100	MS53_0437	MS53_0558	MS53_0311	MS53_0303	MS53_0308	MS53_0169	MS53_0622
		Mycoplasma cynos C142	NC_019949	MCYN_RS02605	MCYN_RS00805	MCYN_RS00790	MCYN_RS00795	MCYN_RS00850	MCYN_RS00865	MCYN_RS01160	MCYN_RS02610	MCYN_RS01165	MCYN_RS00415	MCYN_RS00840	MCYN_RS00880	MCYN_RS00825	MCYN_RS00265	MCYN_RS00870	MCYN_RS00550	MCYN_RS00845	MCYN_RS00960	MCYN_RS01570	MCYN_RS00555	MCYN_RS00820	MCYN_RS02415	MCYN_RS00875	MCYN_RS03170	MCYN_RS03970	MCYN_RS00860	MCYN_RS00420	MCYN_RS00785	MCYN_RS00255	MCYN_RS03975	MCYN_RS00250	MCYN_RS00955	MCYN_RS00835	MCYN_RS00810	MCYN_RS03320	MCYN_RS00620	MCYN_RS02050	MCYN_RS03215	MCYN_RS00755	MCYN_RS00565	MCYN_RS01025	MCYN_RS01750	MCYN_RS01650	MCYN_RS02140	MCYN_RS02665	MCYN_RS00070
		Mycoplasma canis LV	NZ_CP011368.1	AAW50_RS00990	AAW50_RS02895	AAW50_RS02910	AAW50_RS02905	AAW50_RS02850	AAW50_RS02835	AAW50_RS02265	AAW50_RS00995	AAW50_RS02260	AAW50_RS03195	AAW50_RS02860	AAW50_RS02820	AAW50_RS02875	AAW50_RS02650	AAW50_RS02830	AAW50_RS03125	AAW50_RS02855	AAW50_RS02720	AAW50_RS01755	AAW50_RS03120	AAW50_RS02880	AAW50_RS00330	AAW50_RS02825	AAW50_RS02000	AAW50_RS03435	AAW50_RS02840	AAW50_RS03190	AAW50_RS02915	AAW50_RS02660	AAW50_RS03430	AAW50_RS02665	AAW50_RS02725	AAW50_RS02865	AAW50_RS02890	AAW50_RS02205	AAW50_RS03050	AAW50_RS00390	AAW50_RS02030	AAW50_RS02940	AAW50_RS03110	AAW50_RS01545	AAW50_RS00650	AAW50_RS01670	AAW50_RS00880	AAW50_RS03560	AAW50_RS00080
		Mycoplasma pulmonis UAB CTIP	NC_002771.1	MYPU_0100	MYPU_5850	MYPU_5890	MYPU_5870	MYPU_5750	MYPU_5720	MYPU_2900	MYPU_0090	MYPU_2890	MYPU_4950	MYPU_5770	MYPU_5690	MYPU_5800	MYPU_5600	MYPU_5710	MYPU_2610	MYPU_5760	MYPU_6960	MYPU_3240	MYPU_2600	MYPU_5810	MYPU_7160	MYPU_5700	MYPU_6110	MYPU_4290	MYPU_5730	MYPU_4960	MYPU_5900	MYPU_5620	MYPU_4300	MYPU_5630	MYPU_3280	MYPU_5780	MYPU_5840	MYPU_6560	MYPU_5570	MYPU_7710	MYPU_1770	MYPU_6820	MYPU_3330	MYPU_6670	MYPU_0930	MYPU_4900	MYPU_3480	MYPU_7450	MYPU_4850
		Mycoplasma hyopneumoniae 232	NC_006360.1	mhp458	mhp190	mhp187	mhp188	mhp200	mhp203	mhp638	mhp459	mhp637	mhp672	mhp198	mhp206	mhp195	mhp214	mhp204	mhp258	mhp199	mhp259	mhp104b	mhp257	mhp194	mhp593	mhp205	mhp307	mhp084	mhp202	mhp671	mhp186	mhp212	mhp085	mhp211	mhp276	mhp197	mhp191	mhp135	mhp180	mhp416	mhp661	mhp241	mhp138	mhp033	mhp667	mhp410	mhp106	mhp609	mhp066
		Mycoplasma dispar ATCC 27140	NZ_CP007229	MDIS_RS01780	MDIS_RS01505	MDIS_RS01490	MDIS_RS01495	MDIS_RS01550	MDIS_RS01560	MDIS_RS00395	MDIS_RS01775	MDIS_RS00390	MDIS_RS03665	MDIS_RS01540	MDIS_RS01575	MDIS_RS01525	MDIS_RS01620	MDIS_RS01565	MDIS_RS00865	MDIS_RS01545	MDIS_RS00860	MDIS_RS01350	MDIS_RS00870	MDIS_RS01520	MDIS_RS00745	MDIS_RS01570	MDIS_RS01680	MDIS_RS03615	MDIS_RS01555	MDIS_RS03670	MDIS_RS01485	MDIS_RS01610	MDIS_RS03620	MDIS_RS01605	MDIS_RS03605	MDIS_RS01535	MDIS_RS01510	MDIS_RS00605	MDIS_RS01120	MDIS_RS01210	MDIS_RS03725	MDIS_RS00970	MDIS_RS00735	MDIS_RS00100	MDIS_RS03695	MDIS_RS02025	MDIS_RS01360	MDIS_RS03015	MDIS_RS00280
		Mycoplasma ovipneumoniae 14811	GCA_000590415.1	Movi_s03_0530	Movi_s01_2030	Movi_s01_2060	Movi_s01_2050	Movi_s01_1940	Movi_s01_1920	Movi_s01_2810	Movi_s03_0520	Movi_s01_2800	Movi_s03_2150	Movi_s01_1960	Movi_s01_1890	Movi_s01_1990	Movi_s01_1810	Movi_s01_1910	Movi_s03_0860	Movi_s01_1950	Movi_s03_0865	Movi_s01_1045	Movi_s03_0850	Movi_s01_2000	Movi_s01_1290	Movi_s01_1900	Movi_s03_2620	Movi_s03_2510	Movi_s01_1930	Movi_s03_2140	Movi_s01_2070	Movi_s01_1830	Movi_s03_2520	Movi_s01_1840	Movi_s03_0510	Movi_s01_1970	Movi_s01_2020	Movi_s03_0540	Movi_s03_1820	Movi_s03_2030	Movi_s01_1690	Movi_s03_2400	Movi_s03_1230	Movi_s01_2660	Movi_s01_1750	Movi_s01_4000	Movi_s01_1030	Movi_s01_3830	Movi_s01_2360
		Mycoplasma hyorhinis HUB-1	NC_014448.1	MHR_0272	MHR_0399	MHR_0402	MHR_0401	MHR_0390	MHR_0387	MHR_0053	MHR_0271	MHR_0054	MHR_0124	MHR_0392	MHR_0384	MHR_0395	MHR_0376	MHR_0386	MHR_0519	MHR_0391	MHR_0518	MHR_0542	MHR_0520	MHR_0396	MHR_0083	MHR_0385	MHR_0527	MHR_0501	MHR_0388	MHR_0125	MHR_0403	MHR_0378	MHR_0500	MHR_0379	MHR_0157	MHR_0393	MHR_0398	MHR_0422	MHR_0537	MHR_0270	MHR_0239	MHR_0322	MHR_0144	MHR_0132	MHR_0232	MHR_0334	MHR_0544	MHR_0603	MHR_0116
		Mycoplasma salivarium ATCC 23064	GCF_000485555.1	F800_RS0101845	F800_RS0100820	F800_RS0100805	F800_RS0100810	F800_RS0100865	F800_RS0100880	F800_RS0102090	F800_RS0101850	F800_RS0102095	F800_RS0101310	F800_RS0100855	F800_RS0100895	F800_RS0100840	F800_RS0100940	F800_RS0100885	F800_RS0100645	F800_RS0100860	F800_RS0100300	F800_RS0100945	F800_RS0100640	F800_RS0100835	F800_RS0101220	F800_RS0100890	F800_RS0103090	F800_RS0102190	F800_RS0100875	F800_RS0101315	F800_RS0100800	F800_RS0100930	F800_RS0102185	F800_RS0100925	F800_RS0101450	F800_RS0100850	F800_RS0100825	F800_RS0102000	F800_RS0100655	F800_RS0102270	F800_RS0102505	F800_RS0102855	F800_RS0101100	F800_RS0101430	F800_RS0100770	F800_RS0102125	F800_RS0103200	F800_RS0100015	F800_RS0101375
		Mycoplasma hyosynoviae NPL7	GCA_000691385.1	M_hys_WP_036441834.1	M_hys_WP_036440725.1	M_hys_WP_036440719.1	M_hys_WP_051599107.1	M_hys_WP_036440745.1	M_hys_WP_036440754.1	M_hys_WP_036441151.1	M_hys_WP_036441837.1	M_hys_WP_036441149.1	M_hys_WP_036441323.1	M_hys_WP_036440740.1	M_hys_WP_036440760.1	M_hys_WP_036440737.1	M_hys_WP_036440783.1	M_hys_WP_036440757.1	M_hys_WP_036440574.1	M_hys_WP_036440742.1	M_hys_WP_036441950.1	M_hys_WP_036440786.1	M_hys_WP_036440571.1	M_hys_WP_036440734.1	M_hys_WP_036440893.1	M_hys_WP_051599108.1	M_hys_WP_051599089.1	M_hys_WP_036441624.1	M_hys_WP_036440752.1	M_hys_WP_036441326.1	M_hys_WP_036440715.1	M_hys_WP_036440776.1	M_hys_WP_036441627.1	M_hys_WP_036440772.1	M_hys_WP_036441341.1	M_hys_WP_036440804.1	M_hys_WP_036440728.1	M_hys_WP_036440961.1	M_hys_WP_036441907.1	M_hys_WP_036440179.1	M_hys_WP_036440974.1	M_hys_WP_036440195.1	M_hys_WP_036441417.1	M_hys_WP_036440850.1	M_hys_WP_036441301.1	M_hys_WP_036440878.1	M_hys_WP_036440545.1	M_hys_WP_036440290.1	M_hys_WP_036441331.1
		Mycoplasma auris 15026	GCA_000367765.1	Maur_s01_5310	Maur_s01_3250	Maur_s01_3220	Maur_s01_3230	Maur_s01_3340	Maur_s01_3360	Maur_s01_3000	Maur_s01_5300	Maur_s01_3010	Maur_s01_3650	Maur_s01_3320	Maur_s01_3390	Maur_s01_3290	Maur_s01_3475	Maur_s01_3370	Maur_s01_6500	Maur_s01_3330	Maur_s01_6240	Maur_s01_3477	Maur_s01_6510	Maur_s01_3280	Maur_s01_5120	Maur_s01_3380	Maur_s01_0310	Maur_s01_2770	Maur_s01_3350	Maur_s01_3640	Maur_s01_3210	Maur_s01_3460	Maur_s01_2760	Maur_s01_3450	Maur_s01_3620	Maur_s01_3310	Maur_s01_3260	Maur_s01_3940	Maur_s01_5730	Maur_s01_0860	Maur_s01_1520	Maur_s01_0760	Maur_s01_4680	Maur_s01_3130	Maur_s01_3140	Maur_s01_2570	Maur_s01_0270	Maur_s01_4000	Maur_s01_5410
		Mycoplasma arginini 7264	GCA_000367785.1	Marg_s01_1300	Marg_s01_5050	Marg_s01_5080	Marg_s01_5070	Marg_s01_4960	Marg_s01_4930	Marg_s01_5270	Marg_s01_1310	Marg_s01_5260	Marg_s01_0290	Marg_s01_4980	Marg_s01_4900	Marg_s01_5010	Marg_s01_4820	Marg_s01_4920	Marg_s01_2760	Marg_s01_4970	Marg_s01_2580	Marg_s01_4810	Marg_s01_2770	Marg_s01_5020	Marg_s01_1400	Marg_s01_4910	Marg_s01_3990	Marg_s01_5310	Marg_s01_4940	Marg_s01_0300	Marg_s01_5090	Marg_s01_4840	Marg_s01_5320	Marg_s01_4850	Marg_s01_0340	Marg_s01_4990	Marg_s01_5040	Marg_s01_1830	Marg_s01_4760	Marg_s01_3300	Marg_s01_2170	Marg_s01_3200	Marg_s01_0690	Marg_s01_5130	Marg_s01_5120	Marg_s01_5510	Marg_s01_3940	Marg_s01_1780	Marg_s01_1170
		Mycoplasma spumans ATCC19526	JHVF01000003	M_spu_WP_027122522.1	M_spu_WP_027122893.1	M_spu_WP_051520284.1	M_spu_WP_027122895.1	M_spu_WP_036476102.1	M_spu_WP_027122881.1	M_spu_WP_027122632.1	M_spu_WP_027122523.1	M_spu_WP_027122631.1	M_spu_WP_027122806.1	M_spu_WP_027122886.1	M_spu_WP_027122878.1	M_spu_WP_027122889.1	M_spu_WP_027122870.1	M_spu_WP_027122880.1	M_spu_WP_027122736.1	M_spu_WP_027122885.1	M_spu_WP_027122583.1	M_spu_WP_027122869.1	M_spu_WP_027122737.1	M_spu_WP_027122890.1	M_spu_WP_027122927.1	M_spu_WP_051520286.1	M_spu_WP_027122754.1	M_spu_WP_027122639.1	M_spu_WP_036476098.1	M_spu_WP_027122807.1	M_spu_WP_027122897.1	M_spu_WP_027122872.1	M_spu_WP_027122640.1	M_spu_WP_027122873.1	M_spu_WP_027122809.1	M_spu_WP_027122887.1	M_spu_WP_027122892.1	M_spu_WP_027123023.1	M_spu_WP_027122734.1	M_spu_WP_027122465.1	M_spu_WP_027122845.1	M_spu_WP_027122475.1	M_spu_WP_027122702.1	M_spu_WP_027122901.1	M_spu_WP_027122902.1	M_spu_WP_027122647.1	M_spu_WP_027122748.1	M_spu_WP_027122760.1	M_spu_WP_027122621.1
		Mycoplasma hominis ATCC 23114	NC_013511.1	MHO_0880	MHO_2950	MHO_2980	MHO_2970	MHO_2860	MHO_2830	MHO_2700	MHO_0870	MHO_2690	MHO_2240	MHO_2880	MHO_2800	MHO_2910	MHO_2720	MHO_2820	MHO_1290	MHO_2870	MHO_0070	MHO_2710	MHO_1280	MHO_2920	MHO_0800	MHO_2810	MHO_1120	MHO_1460	MHO_2840	MHO_2230	MHO_2990	MHO_2740	MHO_1450	MHO_2750	MHO_2220	MHO_2890	MHO_2940	MHO_1010	MHO_1310	MHO_4490	MHO_0610	MHO_4390	MHO_1870	MHO_3050	MHO_3060	MHO_1370	MHO_1170	MHO_1060	MHO_2630
		Mycoplasma arthritidis 158L3-1	NC_011025	MARTH_orf143	MARTH_orf440	MARTH_orf444	MARTH_orf442	MARTH_orf430	MARTH_orf426	MARTH_orf208	MARTH_orf144	MARTH_orf211	MARTH_orf386	MARTH_orf432	MARTH_orf422	MARTH_orf435	MARTH_orf409	MARTH_orf425	MARTH_orf194	MARTH_orf431	MARTH_orf005	MARTH_orf408	MARTH_orf193	MARTH_orf436	MARTH_orf682	MARTH_orf423	MARTH_orf696	MARTH_orf313	MARTH_orf428	MARTH_orf385	MARTH_orf446	MARTH_orf412	MARTH_orf315	MARTH_orf414	MARTH_orf369	MARTH_orf433	MARTH_orf439	MARTH_orf244	MARTH_orf202	MARTH_orf850	MARTH_orf132	MARTH_orf641	MARTH_orf392	MARTH_orf589	MARTH_orf171	MARTH_orf217	MARTH_orf176	MARTH_orf703	MARTH_orf329
		Mycoplasma mobile 163K	NC_006908	MMOB1390	MMOB2380	MMOB2350	MMOB2360	MMOB2470	MMOB2500	MMOB5330	MMOB1400	MMOB5340	MMOB2290	MMOB2450	MMOB2530	MMOB2420	MMOB2620	MMOB2510	MMOB6270	MMOB2460	MMOB4150	MMOB3560	MMOB6280	MMOB2410	MMOB0690	MMOB2520	MMOB2270	MMOB3680	MMOB2490	MMOB2300	MMOB2340	MMOB2600	MMOB3690	MMOB2590	MMOB4690	MMOB2440	MMOB2390	MMOB5200	MMOB4390	MMOB5070	MMOB1480	MMOB0050	MMOB2730	MMOB4070	MMOB5390	MMOB3150	MMOB3170	MMOB5010	MMOB5470
		Hepatoplasma crinochetorum Av	CP006932.1	X271_RS02485	X271_RS02005	X271_RS02020	X271_RS02015	X271_RS01960	X271_RS01945	X271_RS02480	X271_RS02490	X271_RS02475	X271_RS00835	X271_RS01970	X271_RS01930	X271_RS01985	X271_RS01585	X271_RS01940	X271_RS01710	X271_RS01965	X271_RS02370	X271_RS01070	X271_RS01705	X271_RS01990	X271_RS01700	X271_RS01935	X271_RS00100	X271_RS00200	X271_RS01950	X271_RS00840	X271_RS02025	X271_RS01595	X271_RS00195	X271_RS01600	X271_RS00935	X271_RS01975	X271_RS02000	X271_RS02125	X271_RS01520	X271_RS00285	X271_RS02510	X271_RS02615	X271_RS02240	X271_RS01280	X271_RS01560	X271_RS02940	X271_RS00990	X271_RS01315	X271_RS00375
	pneumoniae	Mycoplasma iowae 695	GCA_000227355.2	GUU_04474	GUU_01362	GUU_01377	GUU_01372	GUU_01317	GUU_01302	GUU_03840	GUU_04479	GUU_03835	GUU_01672	GUU_01327	GUU_01287	GUU_01342	GUU_01242	GUU_01297	GUU_03571	GUU_01322	GUU_04559	GUU_03661	GUU_03576	GUU_01347	GUU_02668	GUU_01292	GUU_01952	GUU_04424	GUU_01307	GUU_01667	GUU_01382	GUU_01252	GUU_04429	GUU_01257	GUU_03143	GUU_01332	GUU_01357	GUU_03751	GUU_02162	GUU_03890	GUU_01467	GUU_01002	GUU_01642	GUU_01812	GUU_03133	GUU_03631	GUU_01842	GUU_00372	GUU_02374
		Mycoplasma penetrans HF-2	NC_004432.1/	MYPE260	MYPE10150	MYPE10180	MYPE10170	MYPE10050	MYPE10020	MYPE5740	MYPE250	MYPE5730	MYPE810	MYPE10070	MYPE9990	MYPE10110	MYPE9910	MYPE10010	MYPE9150	MYPE10060	MYPE4030	MYPE9200	MYPE9155	MYPE10090	MYPE7550	MYPE10000	MYPE1140	MYPE300	MYPE10030	MYPE820	MYPE10190	MYPE9930	MYPE290	MYPE9940	MYPE3880	MYPE10080	MYPE10130	MYPE480	MYPE8540	MYPE4040	MYPE220	MYPE10370	MYPE2860	MYPE8820	MYPE3890	MYPE9380	MYPE9270	MYPE4580	MYPE7960
		Ureaplasma parvum serovar 3 ATCC 700970	NC_002162.1	UU540	UU234	UU231	UU232	UU243	UU246	UU010	UU541	UU011	UU577	UU241	UU249	UU238	UU258	UU247	UU229	UU242	UU209.1	UU333	UU228	UU237	UU498	UU248	UU554	UU524	UU245	UU576	UU230	UU256	UU525	UU255	UU204	UU240	UU235	UU310	UU369	UU365	UU123	UU599	UU285	UU410	UU371	UU197	UU458	UU175	UU117
		Mycoplasma pneumoniae M129	NC_000912.1	MPN220	MPN168	MPN165	MPN166	MPN177	MPN180	MPN538	MPN219	MPN539	MPN617	MPN175	MPN183	MPN172	MPN192	MPN181	MPN117	MPN176	MPN624	MPN540	MPN116	MPN171	MPN446	MPN182	MPN228	MPN226	MPN179	MPN616	MPN164	MPN190	MPN225	MPN189	MPN622	MPN174	MPN169	MPN541	MPN418	MPN252	MPN356	MPN678	MPN045	MPN520	MPN384	MPN023	MPN105	MPN265	MPN669
		Mycoplasma genitalium G37	NC_000908.2	MG082	MG154	MG151	MG152	MG163	MG166	MG361	MG081	MG362	MG418	MG161	MG169	MG158	MG178	MG167	MG198	MG162	MG426	MG363	MG197	MG157	MG311	MG168	MG090	MG088	MG165	MG417	MG150	MG176	MG087	MG175	MG424	MG160	MG155	MG363.1	MG292	MG113	MG253	MG462	MG035	MG345	MG266	MG021	MG194	MG126	MG455
		Mycoplasma gallisepticum R (low)	NC_004829.2	MGA_0504	MGA_0712	MGA_0707	MGA_0710	MGA_0729	MGA_0734	MGA_0872	MGA_0503	MGA_0874	MGA_1154	MGA_0726	MGA_0739	MGA_0721	MGA_0441	MGA_0735	MGA_1274	MGA_0728	MGA_0253	MGA_1326	MGA_1273	MGA_0717	MGA_0264	MGA_0737	MGA_0423	MGA_0261	MGA_0733	MGA_1055	MGA_0705	MGA_0445	MGA_0262	MGA_0447	MGA_0766	MGA_0725	MGA_0714	MGA_0844	MGA_0834	MGA_1065	MGA_0533	MGA_0594	MGA_0947	MGA_1196	MGA_0087	MGA_0893	MGA_1278	MGA_0293	MGA_1144
	AAP	Ca. Phytoplasma mali AT	NC_011047.1	ATP_00387	ATP_00344	ATP_00341	ATP_00342	ATP_00353	ATP_00356	ATP_00388	ATP_00386	ATP_00389	ATP_00332	ATP_00351	ATP_00360	ATP_00348	ATP_00368	ATP_00357	ATP_00443	ATP_00352	ATP_00278	ATP_00308	ATP_00442	ATP_00347	ATP_00310	ATP_00358	ATP_00180	ATP_00393	ATP_00355	ATP_00333	ATP_00340	ATP_00366	ATP_00392	ATP_00365	ATP_00269	ATP_00350	ATP_00345	ATP_00133	ATP_00248	ATP_00158	ATP_00335	ATP_00334	ATP_00270	ATP_00252	ATP_00446	ATP_00376	ATP_00080	ATP_00092	ATP_00114
		Ca. Phytoplasma australiense	NC_010544.1	PA0668	PA0584	PA0587	PA0586	PA0575	PA0572	PA0667	PA0669	PA0666	PA0496	PA0577	PA0568	PA0580	PA0559	PA0571	PA0097	PA0576	PA0715	PA0589	PA0096	PA0581	PA0088	PA0570	PA0152	PA0662	PA0573	PA0497	PA0588	PA0561	PA0663	PA0562	PA0494	PA0578	PA0583	PA0599	PA0509	PA0026	PA0499	PA0498	PA0485	PA0346	PA0104	PA0128	PA0532	PA0542	PA0546
		Ca.Phytoplasma asteris Onion Yellows strain	NC_005303.2	PAM257	PAM203	PAM200	PAM201	PAM212	PAM215	PAM258	PAM256	PAM259	PAM138	PAM210	PAM219	PAM207	PAM228	PAM216	PAM742	PAM211	PAM106	PAM198	PAM743	PAM206	PAM586	PAM217	PAM009	PAM263	PAM214	PAM139	PAM199	PAM226	PAM262	PAM225	PAM136	PAM209	PAM204	PAM081	PAM305	PAM754	PAM141	PAM140	PAM127	PAM184	PAM738	PAM233	PAM596	PAM466	PAM469
		Acholeplasma palmae J233	NC_022538	BN854_RS06440	BN854_RS06785	BN854_RS06800	BN854_RS06795	BN854_RS06740	BN854_RS06725	BN854_RS06435	BN854_RS06445	BN854_RS06430	BN854_RS06510	BN854_RS06750	BN854_RS06705	BN854_RS06765	BN854_RS06660	BN854_RS06720	BN854_RS03920	BN854_RS06745	BN854_RS02095	BN854_RS03325	BN854_RS03915	BN854_RS06770	BN854_RS01245	BN854_RS06715	BN854_RS06340	BN854_RS06370	BN854_RS06730	BN854_RS06505	BN854_RS06805	BN854_RS06670	BN854_RS06375	BN854_RS06675	BN854_RS04685	BN854_RS06755	BN854_RS06780	BN854_RS03595	BN854_RS03500	BN854_RS07310	BN854_RS06490	BN854_RS06500	BN854_RS04895	BN854_RS04410	BN854_RS02030	BN854_RS06585	BN854_RS02065	BN854_RS01355	BN854_RS01325
		Acholeplasma laidlawii PG-8A	NC_010163.1	ACL_0167	ACL_0090	ACL_0087	ACL_0088	ACL_0099	ACL_0102	ACL_0168	ACL_0166	ACL_0169	ACL_0137	ACL_0097	ACL_0106	ACL_0094	ACL_0115	ACL_0103	ACL_0841	ACL_0098	ACL_0255	ACL_0554	ACL_0842	ACL_0093	ACL_1200	ACL_0104	ACL_0193	ACL_0186	ACL_0101	ACL_0138	ACL_0086	ACL_0113	ACL_0185	ACL_0112	ACL_0809	ACL_0096	ACL_0091	ACL_0892	ACL_0906	ACL_1427	ACL_0143	ACL_0139	ACL_0824	ACL_0702	ACL_0242	ACL_0132	ACL_0249	ACL_1182	ACL_1185
		Acholeplasma brassicae O502	NC_022549.1	BN85303020	BN85302380	BN85302350	BN85302360	BN85302470	BN85302490	BN85303030	BN85303010	BN85303040	BN85302790	BN85302450	BN85302530	BN85302420	BN85302610	BN85302500	BN85308700	BN85302460	BN85305210	BN85312270	BN85308690	BN85302410	BN85313680	BN85302510	BN85303160	BN85303090	BN85302480	BN85302800	BN85302340	BN85302590	BN85303080	BN85302580	BN85308950	BN85302440	BN85302390	BN85310170	BN85310340	BN85316970	BN85302920	BN85302890	BN85308130	BN85307690	BN85304420	BN85302770	BN85305150	BN85313500	BN85313530
[truncated: 16 more columns]
