# Supplementary material for: Multiple Origins and Specific Evolution of CRISPR/Cas9 Systems in Minimal Bacteria (Mollicutes)
Source: Front Microbiol. 2019 Nov 21;10:2701. doi: 10.3389/fmicb.2019.02701 (PMC6882279; doi:10.3389/fmicb.2019.02701)
Supplement: Supplementary file 13 [file Table_5.xlsx]

## Sheet: Feuil1
Table S5. 595 spacers from mollicute CRISPR arrays. Spacers with the same colour are repeated. The 15 spacers in light green have identified targets in mollicutes or phage genomes.
Spiroplasma apis B31	Spiroplasma helicoides GCF_001715535	Spiroplasma litorale strain TN-1	Spiroplasma syrphidicola EA-1		Acholeplasma palmae J233	Mycoplasma synoviae 53	Mycoplasma gallisepticum S6	Mycoplasma lipofaciens ATCC 35015	Mycoplasma cynos C142	Mycoplasma canis PG 14	Mycoplasma dispar ATCC 27140		Mycoplasma ovipneumoniae NM2010			Mycoplasma arginini HAZ145_1	Mycoplasma hyosynoviae strain NPL1	Mycoplasma arthritidis 158L3-1	Mycoplasma mobile 163K	Ca. Hepatoplasma crinochetorum Av
>spacer1apis	>spacer1helicoides	>spacer1litorale (DR différente)	>spacer28syrphidicola	>spacer1syrphidicola	>spacer1palmae	>spacer0synoviae	>spacer1galli	https://www.ncbi.nlm.nih.gov/nuccore/652839598?report=fasta	>spacer1cynos	>spacer1canis	>spacer17dispar	>spacer1dispar	>spacer82ovipneu	>spacer53ovipneu	>spacer1ovipneu	>spacer1argini	>spacer1hyosynoviae	>spacer1arthri	>spacer0mobile (DR différente)	>spacer1crinochetorum	>spacer2crinochetorum
AATCGCTCTAAATATTCTCAAACAGATCTA	CTAGTGCTTCATCATCATTAAAACTAAAAG	CCATTAATAAAACTAAACCTTCAAAGTTTG	TAATTTTTAAACTAATACCAATAGTCATAT	TCTTGTTTTTTTCAACTTTGTAATGATCCA	CATCTATCATCATAGCCCACTCGTATCTTA	AAATGATAAATAACGCTTAACTTGCTTACT	TTTGGGATCTTATTTTCTCACCTCACCCGT	http://crispr.i2bc.paris-saclay.fr/cgi-bin/crispr/advRunCRISPRFinder.cgi#NZ_JMKY01000001.1_PossibleCrispr_1	TTTGATGCTTCATTTATTCAGCTAGAATAT	AAAAACTAATATGAATATGCGGATTATTCG	AATGAAGTAATCGAATATTTAAAACAATTA	GTCCCCGGGTCGTAATAAAGCGCTGCTCAA	AAAAATTTTTACTTTTATATAATTATAAGTA	ATTGAAATTTACAGGATTACTACAAGGGTCA	AGTAACAGTTATTTTTATAAGTTCATAAAA	GATATTTTATTAAAAGTTTGAAACAAAGAT	TGGTGCGGCCTTTACAATAAAAATTATGA	ATTTAATAGAACAATTAAACCTGATTATAT	TGTTTGAAAAAGTGGAGTTGTTTGTCTAAT	AACTTCATTATCATTATCTTTGTAAGGAAA	CATCTGATCAATTATATGTAGTTATTATTG
>spacer2apis	>spacer2helicoides	>spacer2litorale	>spacer29syrphidicola	>spacer2syrphidicola	>spacer2palmae	>spacer1synoviae	>spacer2galli		>spacer2cynos	>spacer2canis	>spacer18dispar	>spacer2dispar	>spacer83ovipneu	>spacer54ovipneu	>spacer2ovipneu	>spacer2argini	>spacer2hyosynoviae	>spacer2arthri	>spacer1mobile		>spacer3crinochetorum
AAACAACGAGACGTTACATTTTATGATAAA	CAATATCAGAAATTAAACTTTGATTAAAGT	ATAATCTCTTTTGCAATAGATAAAGATTTT	TTCGCACATTTTAGCGTCTTCTTGTTCTTG	CAATGTGAATGCTAATCGCTTTAATGGTTT	TAATAGGCGTTCTATGGTTGTAAAATCAA	CCTATAAACAAATCAGGATTATATGTACTA	TTAAAACTAACTAAGTTTGTTTCTCCGTTG		TTGATGATGAAGAAATTTTAACAGCAGAAA	CATTGTCCGGGATTACTTGCTTTGTTAAAT	ATAACAGCAAAGTTATCATAATTCTGAATT	GAATTGGCGGAATTTTCCTTTATCGCCGGA	TATCACGAAGCTCAAACAAAAAATCAAGCA	ATAACAAAAATTGAAGAAATTGCCAAACGT	ACAATTTAATAAATTTATTTTAGTTTCGTT	AATATTGGACGAAAATGAATTGATTCAAAT	CAAAATAATTAGCATTTTCATAGGTATTTA	AAATTTGTTATCTAATAATTCAGCGATATT	ATTTATCTTGCAATGCTTGGAGTAAAATTA		TAATCTTAATGCAATATTAAATATTATTTC
>spacer3apis	>spacer3helicoides	>spacer3litorale	>spacer30syrphidicola	>spacer3syrphidicola	>spacer3palmae	>spacer2synoviae	>spacer3galli		>spacer3cynos	>spacer3canis	>spacer19dispar	>spacer3dispar	>spacer84ovipneu	>spacer55ovipneu	>spacer3ovipneu	>spacer3argini	>spacer3hyosynoviae	>spacer3arthri	>spacer2mobile		>spacer4crinochetorum
CTTTACCAATTAACAATGTATGTGTACCTT	CAATTAGAACTGAAATTATATTTTTATGAC	TCTCAAGAAGCTATTTGCTTCATTTTGTTT	ATAATTTGACAATTTTTATCACAACTACTA	CAGTGAGTAGCGATAGGGCAGGTAACCCCT	CTAATATCGTAGGCACAACTTTAATCATTA	TTAAGTCAAGATTTTTAATACCAGGGTGCA	GACTCAAAAACGTCTTTGTTCGTCGTTTAA		TAAGTGGTGTTGTTTGACCTTTAATTTTTA	CCACTTTTGGGAAAATGTGAGACTTTGAAG	GGGGAGTGAAATAGATTCTGAAACCATTTA	GTGAAATTCCAACAGGAAATAATTATACTT	TGAATTTGATTTTTTTTTTGATTTTTT	ATAACAAAAATTGAAGAAATTGCCAAACGT	CTGCCTTTTAAAGGAAAAATAAAAAGACGA	CCGCCAAAAATAAGATTGAAAGCGAAGGAG	TTAAATTAGAAGAACCTAATGGTAATTATG	TTAACATAATCTTCAATGGGGACAAACTCC	ATTTATCTTGCAATGCTTGGAGTAAAATTA		AACGTAAATTTAAGCTTAATTGAACTATTA
>spacer4apis	>spacer4helicoides	>spacer4litorale	>spacer31syrphidicola	>spacer4syrphidicola	>spacer4palmae	>spacer3synoviae	>spacer4galli		>spacer4cynos	>spacer4canis	>spacer20dispar	>spacer4dispar	>spacer85ovipneu	>spacer56ovipneu	>spacer4ovipneu	>spacer4argini	>spacer4hyosynoviae	>spacer4arthri	>spacer3mobile		>spacer5crinochetorum
AGTATCACAAGACGAGTACGACACTCTAGA	TTATAGTCATTAATGTGATTATTAAATTCTA	AACAAATTCGAATTACCAAATAATGCAAAA	CAGTTATTGTATATCTATCTCCATAAAAAT	AGTCGGGGAAGTTAAAGTATTCTTTTGTTA	GTGTTGCTAGTACTTCTGTAGCGTGGATAT	TCCATATTTTTCCTTACTATTACTATGCT	TAGCATAAATTTGATTAACAAATTGTGTAT		AAAGTTAGAATAGACTTCCCTTTACCTGAA	GCGTGTTTTTCATTAATTACAAAAAAATAA	TATTAAGCAGGTGTACCCAGATTTTATTGC	ATAGTCACCTGGTTTTTTATGGTCTTTAAAA	TATTGCTCTACTTATAATTTATTATTATA	ATAACAAAAATTGAAGAAATTGCCAAACGT	AAGGCAATTCGATATATAAATAAGTTTTCG	CACTTGCTGGTTCAACTCCTTTTAGTTTTGC	TACTATCCATAGACAAATAAAGAGGGTTAA	ATGCCATGATGATGTAACCTGTTGGTCTTA	ATATAAAAAATTTTATTTCCGAAAGTGAAT		ATTGAAAAGGTCCATCGCAAATGTTAATAT
>spacer5apis	>spacer5helicoides	>spacer5litorale	>spacer32syrphidicola	>spacer5syrphidicola	>spacer5palmae	>spacer4synoviae	>spacer5galli		>spacer5cynos	>spacer5canis	>spacer21dispar	>spacer5dispar	>spacer86ovipneu	>spacer57ovipneu	>spacer5ovipneu	>spacer5argini	>spacer5hyosynoviae	>spacer5arthri	>spacer4mobile		>spacer6crinochetorum
CTATTTTTATAAACAAAGTACCTATCATTA	ATACATTAATCGCTACATTTGTTATTAATT	TAACCTCGCTCATATTTATTTGACCAAAAA	AATTGTCTTTTAATGTCGTTTATAAATTCT	GACCTTATTTGCTGTATAGAAGGTAAATTT	ATGAAGCAATAAAGAAGTATAACGAAATAA	ACGATTTTAAAAATTATGATATAATATAAC	TGGGAGGATTTACATCTTTTAATCCTAACA		ACCTTTTTACCCATAAAATTCATTATTATG	TTTTTTGGTCTTAATTTTTCATCTTTCACG	TCACCGCACCAGTTTCGTTCTGCGCTTTTA	TAGTTTTAAAAACTTTTCATTAAAACCAAA	TCATATAACTAATTATACCATATTTTCAAT	ATAACAAAAATTGAAGAAATTGCCAAACGT	TGTAATAATAAGGCACCTCCACCCAGGAACG	AATATGCAAAATATAACTGGATCTGCAGAT	ATTTAAATGGTGTGAATTCTTTTGGTTTTA	ATTGGGAACAGCAAGAACCATAAAAATGCAC	TGAATCTCTTCTTCGTTTAATGTATCACGT		AACGTAAATTTAAGCTTAATTGAACTATTA
>spacer6apis	>spacer6helicoides	>spacer6litorale	>spacer33syrphidicola	>spacer6syrphidicola	>spacer6palmae	>spacer5synoviae	>spacer6galli		>spacer6cynos	>spacer6canis	>spacer22dispar	>spacer6dispar		>spacer58ovipneu	>spacer6ovipneu	>spacer6argini	>spacer6hyosynoviae	>spacer6arthri	>spacer5mobile		>spacer7crinochetorum
ATTTTGCCGATAAAGGATTTGCAAGTTGAA	ATATTGAACCAACATGCGAGTTTGTTGCTG	TTAACTCCGTTTGCTCCTACATAATTCAAA	TTTTTAAAATCAATATCAGTTTCACAAGCA	TGCTGTTGTGTGGTGCTGAATGAGTAGGAG	AACCTAAAGAGTTTAACACTAAAGTATTGT	TAGAATCTCTTTTAAATTCCCACCAAGCT	GTTTGGTGTAGCTGTTTATGTCGTAAAGGT		TATTATGTTACAAGTTTGATTATATAAGTC	AATAAAATTGAAATTAATTTTTGAATGATT	AAATTATTTTCGGTAAAAGGGGAAATGTTTA	AATAAGAGTTTATACCTGCAGTCTGTAGGG		ATAACAAAAATTGAAGAAATTGCCAAACGT	AAAATGTATTAGACTTTATTACACACTCAA	TTCAGTTGAAACAGTTTTTAGATTATTATT	ATAATAAAGATATTTTAATAAGTGAATATG	AAATATCTACACGCTCTAAGTACTGCTTTA	ATGTTTTAGAATATGATATTAATTTTAAAA		AGCAGGTTTAGGAAAAACAACTACTGCAAA
>spacer7apis	>spacer7helicoides	>spacer7litorale	>spacer34syrphidicola	>spacer7syrphidicola	>spacer7palmae	>spacer6synoviae	>spacer7galli		>spacer7cynos	>spacer7canis	>spacer23dispar	>spacer7dispar		>spacer59ovipneu	>spacer7ovipneu	>spacer7argini	>spacer7hyosynoviae	>spacer7arthri	>spacer6mobile		>spacer8crinochetorum
GAAATGTATTTCAATAGTTATATTATAACA	AACACTTTCTATAATATGTTCATCATTAAG	ACATTGTAAGTTGGTATCGGGTTTTTATTT	CAATGTAGCACCATCTAGAACATTACGCCC	AGTGTGTGCTAATAAGTTGCAATAGATTAA	CTTTAGGATGGCATAAAGATGATGGGTCTA	CTTTTTTAAATTTTATTATTATAACTTTGT	GTCTCAAAAACAATATCAATCAGGTTCACT		AACTGGAAGTAACACCTGGAATATAAGTAG	CATAGAATTTTGAAATACTTCACAAAAATA	TAAATACTCAACATAAGAATTTGATAGTAT	CATCATGCTAAAAAAGTCTTTGAAATACTG		ATTGAAATTTACAGGATTACTACAAGGGTCA	TCTAATCCTTGATACTCTTTTTCTTTGACG	TTGAGATAGGAAGATTAGAACTTTCTGGCG	GATTTTGAATTAACCTATAAGGCACCGCAA	TATTTTCAGTTCAAATTTGCTTAATACCTT	TATTAAGTGTAGATAAAAAATTATCTTTAA		ATAATATGGTATAAAAAACTATCAAAAAAT
>spacer8apis	>spacer8helicoides	>spacer8litorale	>spacer35syrphidicola	>spacer8syrphidicola	>spacer8palmae	>spacer7synoviae	>spacer8galli		>spacer8cynos		>spacer24dispar	>spacer8dispar		>spacer60ovipneu	>spacer8ovipneu	>spacer8argini	>spacer8hyosynoviae	>spacer8arthri	>spacer7mobile		>spacer9crinochetorum
ATAACTTTAAAAAATATTGACAATTATTAT	AATTGATACTATTTCATTTCTCAAATTCTT	TGAATAGATGAATTGACACTGTTGTTGAAA	ATCACCATACATATAACTTCCTTGTTTAAG	AATAGCTAACACACTATCAACATATGCTAA	CATAAGAAAGGTGGTGATATAATGCTCTAT	AATTGCATCATTAACGTTAAAGACGTTACT	TAGGGGTGGAGATTTGTGATATCGGCTGTG		ACCTTTTTACCCATAAAAGACATTATTATG		AATAAATTTATCAATATCAATATGATTATA	GGGTATGCGCTGTTTTGTCCAGCAGTTTTC		ATTTTTAGAATGTACTCTGAGTCCGGGAGT	AAAAATAAAAACGCCGCCAAAGCGACGCCA	AGATAGAATTGAGAATTTATCATACAGTAA	CCTTCATTTTTAAAAGTTCGACCATAAATT	TTAGCGAACTTGGTAGTAAGACTAATAGACT	AATTACTACATAATGGAAAATCAAATCAAA		TATGTGGTTTTTTTAGTTCCTCACTACCTT
>spacer9apis	>spacer9helicoides	>spacer9litorale		>spacer9syrphidicola	>spacer9palmae	>spacer8synoviae	>spacer9galli		>spacer9cynos		>spacer25dispar	>spacer9dispar		>spacer61ovipneu	>spacer9ovipneu	>spacer9argini	>spacer9hyosynoviae	>spacer9arthri	>spacer8mobile		>spacer10crinochetorum
AAACTTAAGATATTTGCTATCGTAACTTTT	ATAAAAAAAGGAGAAATAAAAAATGATAGA	TTCAGTTGAGTCTGGGTCAAGTGTTTCGTC		AACTTTTTTTAAGTAGTCCATAAACTCGTC	ACAGTTCCCCACTATCTAACCTAACAACTC	AATCAAACAACTCGCTTTCTAAATCATCAA	CTCGGCCCATTCATTCCCACGGCCGATATCA		AATATAATTTTTGCTTTTGATGTAGTTCAT		ATTGATAAAACTATATAAAAACTCGGATAA	ATATTCCGGGATTTGATATTTTCTGTCAGT		ATGTAGATAAGTCTATGCCAAATTTGCCAA	AATAAAATCCAAAAGAATTTATTACCAAAA	TAAAATTCTATGAACTTCTCTCACATAAGT	GTGTTCAACTAATTGGTTTTAGTGATTTCA	AATTCAAAGATGATAACCGTAAAAAATGAG	ATATAAAAAATTTTATTTCCGAAAGTGAAT		TATTAAAATTTGCTAAATATTCGTCTGGTG
>spacer10apis	>spacer10helicoides	>spacer10litorale		>spacer10syrphidicola	>spacer10palmae	>spacer9synoviae	>spacer10galli		>spacer10cynos		>spacer26dispar	>spacer10dispar		>spacer62ovipneu	>spacer10ovipneu	>spacer10argini	>spacer10hyosynoviae	>spacer10arthri	>spacer9mobile		>spacer11crinochetorum
GATAATTACAAAAATAATAAAATGCGCCTT	AGATAATAATTAATACTGGTATATTATTAA	TAATGAAAAGAAAGGAAAAAGAATAATGAC		CGATTGTGGCAATAACACCACCAATCAATA	ATCAGCAATGACTGCTAATACTACTTTATT	TTTGAGCATAATGGCGCTTTGAGTCTTTAG	CAAATAAGCGCTTATATCTATTAAATTTA		AAGGGTTTAAATATTCAAAAATTTGACTAT		AGGGTTACAAAACTTATTTTGTTATTACCT	TATTTGCTCCTTTATTCTAATTTAGATAAA		ATGTAGATAAGTCTATGCCAAATTTGCCAA	TTTAGCGCGACTAAACAGGTGAGATACTTA	AAAAGTGCTTTCTTATCTAAATACCATAAA	TATCAATATTTTCTAATACCAAATCATTTT	ATTAACTTTTGTTATGCTGTGAAAACCGTA	TGTAGGTTATACAGTTGCTTTAAATACTTA		AAAGTAAGAGGCATTTATACCAATGTAAAT
>spacer11apis	>spacer11helicoides	>spacer11litorale		>spacer11syrphidicola	>spacer11palmae	>spacer10synoviae	>spacer11galli		>spacer11cynos		>spacer27dispar	>spacer11dispar		>spacer63ovipneu	>spacer11ovipneu	>spacer11argini	>spacer11hyosynoviae	>spacer11arthri	>spacer10mobile		>spacer12crinochetorum
ATTATTGTAATACTCGCTTGCTTGTACCAA	AATTTTGTTCAACATAATTATCTAGATTTT	CTGCTATTGTACTTTCAAAACTGTTGACAA		ATTGGCATTACACCATTTAATCTAACTGTA	TAGAAGTTTGAAACGCTAACAATATTTACA	AATGCAGATTTAAAAGATTCAGGAACGATT	TTAAAAAAGAAGTTTATAAAACTTTGATTA		AAAATATCCTTATCGATGTTTTTAATGTTT		TAACAAGTGTGTCCATCTGGGCGGAGGTAA	ACAATCATTAAATTTGGTCTTAAATCTGGA		AATATTGAATATAAAAGGTTTGGACGGGTC	TTTGACAACAAGCACGAAGATTTGTTAGAC	ATTTTTATATTAATTTACTCATTCAATAAA	TATCAATATTTTCTAATACCAAATCATTTT	TCTTAACCTTTCAGTTAATTCTGCAATTTTA	CAATGCAGCACTATTTAGAAAATGATTTAA		TTTCATATACATTTGATTACATCAGATATA
>spacer12apis	>spacer12helicoides	>spacer12litorale		>spacer12syrphidicola	>spacer12palmae		>spacer12galli		>spacer12cynos		>spacer28dispar	>spacer12dispar		>spacer64ovipneu	>spacer12ovipneu	>spacer12argini	>spacer12hyosynoviae	>spacer12arthri	>spacer11mobile		>spacer13crinochetorum
CATTTTTATAATGAAAACTTGTCCGTTAGTA	ACATGGGCGATAAAACAGAAATCGTGCAAA	ACCATTTTTGTTTGTGATAACGTGTGATAT		CATATTTCGTAAGTCGTTAAAGCTTTTCAT	ATGCAGAGCTTACAGCACTCGCAAATGCCA		TTTTGGGTATGATTTACAAACCCCAATTTA		AAAATGTTTTTATCTATGTCTTTAATGTTT		AAAAGTTTTTTTGTTTAAGTCATAAACATT	AGAATCAGTTGGAATTTCATAACCACTAGG		GCAAATAACGAATTTAACAAAAGACTTTGT	GGATCCTGATTATCTAAAATATCTCTCTAAT	ATTCATCTTATATCTAGGAACTGCCACAAT	CTAGTCCAATAGAAAACTTAAATGGATCAA	ATTTATAATAATTTTCATGCGTAAATTCCT	CAGACCAGCCTTATTATAAAAGTGAAATTT		CCGTATAATTTCATTGGTCATAATCTTAAA
>spacer13apis	>spacer13helicoides	>spacer13litorale		>spacer13syrphidicola	>spacer13palmae		>spacer13galli		>spacer13cynos		>spacer29dispar	>spacer13dispar		>spacer65ovipneu	>spacer13ovipneu	>spacer13argini	>spacer13hyosynoviae	>spacer13arthri	>spacer12mobile		>spacer14crinochetorum
ACCTGTTTTAAAAAAACCAATTGAAGGTGT	TGGATGTTGCTTACAACAAACTTGTTTACA	GTTAATGAACATGAACTATTAGCATCTTTG		AGAAATTACTACTTTAACAAAATTAAGTCGT	TGGTGTATTTGAGTATATTGGATTAATTCC		TCAATATTTACTTTAAGTCCAATTAGCTCA		TTCATCGCTAGAATTGTAAGCAATTCTCAA		AAAAGTTTTTTTGTTTAAGTCATAAACATT	AGATAGGGACCGAACTGTCTCACGACGTTC		TTAAAAGACAAGGGACTACCTTTATCTGTT	ATCCAGGAGGTAAGGCACCATAAAAAACCC	TTGAGATGATACTGATGGAGATAGTCCTTT	GATAAACTAATTCAACGTCTTCAAGGTGAA	TGATAGTATTGTGACATCAATCATGTAATC	TTTAATTTTGCGCTATCTTTAATTTTTTTA		TAGGTGGGTAAAGAAAAAGGAAAAAAAAA
>spacer14apis	>spacer14helicoides	>spacer14litorale		>spacer14syrphidicola	>spacer14palmae		>spacer14galli		>spacer14cynos		>spacer30dispar	>spacer14dispar		>spacer66ovipneu	>spacer14ovipneu	>spacer14argini	>spacer14hyosynoviae	>spacer14arthri	>spacer13mobile		>spacer15crinochetorum
GATTTTGTCATCATAGACATAATCGTTGTA	TTTGCAATAAACATTAACATGAATATTGCT	GCCTGTTCCTAATGCTAACAAAGTGAACTT		CAATTTTATCAATCATATAAACAGTATTTT	GGATAAATCAAACATTGTAACCTTAGGTAC		TCAATATTTACTTTAAGTCCAATTAGCTCA		TCTCTTTAATGTTTAATGCTATACACTTAA		TACCGCTATTATCGTTACTGTATTTAATAG	GTCTTTTGAAGAGAACATTTTTAGACCAAG		CTATTTTTATTATAAGATTTACTTTTAGCA	AGTTATAATACTTACACCGGTTTTGAATGA	CTTAAATTCCATAATCTGTTACTCTCCTTC	GTATAAGGGTTAAGAATAAAGTTATTTTTA	TCATTTTGATTATATACTTGCTTCGGCATA	AAAAGAAGAATGAGATTTTTTACTAAATGA		TGTCCCTTAATATTAAACGGTCATTTTTAA
>spacer15apis	>spacer15helicoides	>spacer15litorale		>spacer15syrphidicola	>spacer15palmae		>spacer15galli		>spacer15cynos		>spacer31dispar	>spacer15dispar		>spacer67ovipneu	>spacer15ovipneu	>spacer15argini	>spacer15hyosynoviae	>spacer15arthri	>spacer14mobile		>spacer16crinochetorum
TGAAAAGGGAAAAGAAATGTCACGTCCTAT	TCAATTGACCAAGAAATGTTTCTAGGTTTT	TAGAATCACAACTTGCAACCCAGATTTAAT		TCTCCATAAGTTGTTTCATTCATTGGAATC	TCAGTGGTCTTGAAGTATACAACAAGCCAA		CATTTAACATATTTTGTATATCTGCAAAAT		AATTATGTTGCATGTTTGATTGTATAGGTC		TAATACCAATATTATATTCATTAACTTTTA	ATCTGGGTCTAACATAGACTCAATTTCACG		AAATGAGTTCTCACTCACACTCCATTTTTA	ATTTTTCGAATGTATTCTGAGTCTAAAAGT	AAAATATCGGCAGGAGTTAGATTTTTGTAT	TGAATTGGAAGAAATATATGCATTACAAGA	TAATGATAATAACGATTATGATCTAGTTGT	CATATATCTCCTTTTATTGAGAGTTGTTTT		TAATTTTGCTTTTGAACCTTATATTAAAAC
>spacer16apis	>spacer16helicoides	>spacer16litorale		>spacer16syrphidicola	>spacer16palmae		>spacer16galli		>spacer16cynos		>spacer32dispar			>spacer68ovipneu	>spacer16ovipneu	>spacer16argini	>spacer16hyosynoviae	>spacer16arthri	>spacer15mobile		>spacer17crinochetorum
TTTTTCAATAACTAATATTTTTATTAGTTG	GCTGCCTCTGTTGCTTCTGGAGTGGCTTCA	CTCAACTAATTAAAATCTTATTTCATACTT		AATCTTTATTAAAAGTATTATCCATAATAT	GTTTTTCTGCAGATGCTTTAGTGTTTATGT		ACTAATTTAAATTTGTCAATAGTTTTTGTA		TTTCGTCACTAGAATTGAAAGCGATTCTTA		AAATTGTTTACGGTAAAAGGTGATATGTTT			TCGTCAGAAAAACTGGGGGCGTCCCTGCCT	ATTGATAGGGAATTTTTATCTTGGTATAAT	TCAATCTTATTTTTAGCAGTTTTTAAAATA	CAGATAAACGCATATATGAAATATTCTTTT	TCAGCCAGAATTGTTTTTTAGTCAATCAGT	CTGCAGGACAAATAACTTTAAGAAATACA		ACATTGGAATAAATTCCTCTTATTTTTAAT
>spacer17apis	>spacer17helicoides	>spacer17litorale		>spacer17syrphidicola	>spacer17palmae		>spacer17galli		>spacer17cynos		>spacer33dispar			>spacer69ovipneu	>spacer17ovipneu	>spacer17argini	>spacer17hyosynoviae	>spacer17arthri	>spacer16mobile		>spacer18crinochetorum
AAAAAGGTTATTATTAGCATTCTACAAGCC	CAGCAACCATTAAAGCAATGGTTAATAACG	AATAAAAAAATGGTGAGATAATCAAAACTT		TTGTAGTATTTGAATAATCAAATGCTCCAA	CCATAACGTGAATAGATTCCATAATTTAAT		ATAAATTTATTGAATTTGATAATCTCGTCT		ACTCTTTTACCCATAAAGTTCATTAATATG		TAAAGCTGTTAAGATTAGGTTGGGGGTTTG			TTAGATAATAAAAAGTTTATTTATAATATT	AAAATTTACTCAGACCATAGATATTGTCTA	TTATAGGGTGATAAGTAAAGGTAAAAATAT	TATATAAACTCGGAAGTTTATGGGATAAAA	CCAGCCAGCATTACTTTTTAGTCAATCAGT	TTTAAGAAACATAGAAAATAATCAATATGA		AAAACTGAAGTAATCATAATGGTGTCTGCT
>spacer18apis	>spacer18helicoides	>spacer18litorale		>spacer18syrphidicola	>spacer18palmae		>spacer18galli		>spacer18cynos					>spacer70ovipneu	>spacer18ovipneu	>spacer18argini	>spacer18hyosynoviae	>spacer18arthri	>spacer17mobile		>spacer19crinochetorum
TTTTTTTTCTCGTGTACGATTTCGTTCA	CATTATATTTTGGATCAGCAAAACATGTTA	AGCATTTTATCAAATAAAGGGCTTGATTGT		TTGACCCTTTTATCTTATCATACTTATTTT	TTTAGCATTACCAACATAACCCAAAGAGTT		AAATTGAACACTTTAACGAAGGTCAGTTAG		TTGTGATTGAAAATAATTATTATTATAATG					GCATTTTCTTGTAAAGAAGTTTTTAGACAA	GACCCCCAACCCCCAATCCTTATCACAACC	AAAAAGTCAAAAATATAGTTATATGTCTAA	AGTTTTGGAAATATATTGCTCTATCTATTC	TCAGCCAGAATTGTTTTTTAGTCAATCAGT	TACAAAGACCAGAACTAATAGGAGCATTTT		TATAGCAATGTAAATCCACTAATATTTTTA
>spacer19apis	>spacer19helicoides	>spacer19litorale		>spacer19syrphidicola	>spacer19palmae		>spacer19galli							>spacer71ovipneu	>spacer19ovipneu	>spacer19argini	>spacer19hyosynoviae	>spacer19arthri	>spacer18mobile		>spacer20crinochetorum
TTTTTTTTCTCGTGTACGATTTCGTTCA	TTGAGCAAGTTGAGTGATATGAAGCATATA	ATGTGTGATTTAAATAGAATTAGACAACCA		GTATAAGCTACTCCTCCTTGTGAAAAACTA	GTACATATGACAATCCGTTTGATGGGTACA		TTAATTTAATAGGTGTTAAGGGTTATGAAG							TTTGACTGACGCAAAGGCATTTCCTTTTTTA	CTAAAAGTGACTCTATGCCCAGGATATTTT	TAATATTATTATAAGATAAATTCTCAATCC	GATAAAGTGTATTTCAATAAATTGGCGTAA	CCAGCCAGCATTACTTTTTAGTCAATCAGT	TGACGAAACTCATTCATATCAATACCTTTT		AACGTAGAATATGAGAATTGCAGTTGATTT
>spacer20apis	>spacer20helicoides	>spacer20litorale		>spacer20syrphidicola	>spacer20palmae		>spacer20galli							>spacer72ovipneu	>spacer20ovipneu	>spacer20argini	>spacer20hyosynoviae	>spacer20arthri	>spacer19mobile		>spacer21crinochetorum
ATATTCTTGATCGACAAGATTGTTAAAAGT	CTAGTTTTATAACTTATTTTATACATTTTT	TGTGGAATTTCACTTTTTTCAATCTGTATC		CTAACTACTTGCTAGTATAGTATGTGATGT	ACCAAATCTTAGATAACGCGCTTTTATTGT		AACTTGAAAACGACTTCGTGTTTGGTCTAT							TACTTTTAATAGTCCTATTTGACTAGACCA	TTGCTCGCTTATTTTTTCAGAGTTGTTATT	TAAGCAAAGCCTCATTCTCTGCGATTAATT	AAGATAAACTATCAATTAAATCACTTATAT	TGATAAAACCAGTGCAAAATTGATTGGATA	GCATAACTTAATTTGTATTTATAAGGTCGT		AATTAGTTTTTTCTTATATAGTTATATTAT
>spacer21apis	>spacer21helicoides	>spacer21litorale		>spacer21syrphidicola	>spacer21palmae		>spacer21galli							>spacer73ovipneu	>spacer21ovipneu	>spacer21argini	>spacer21hyosynoviae	>spacer21arthri	>spacer20mobile		>spacer22crinochetorum
CTCAATAGATGTAAACAATGTTTCACAACC	GTGGCAATGTTGAAATACAGGAAAACCACA	CATTGTATTTAAATCATTCCATTTTTCTTT		CCCTAATGAAGCTATTATTATGGATGGATT	GTACATATGACAATCCGTTTGATGCGTACA		TTAAACAGATCGATAAATTTGCAGCTGAAA							GTAAAAAGATAAATAAGGCAGCTAGCTCTA	TTTTTTGCTGGTTTAGATAACTAAAAGAAT	AGAGTATTCGCCTTGATTATAATTTACTAA	TTTATAAGCAGTTGGAAGACGCTAAAGCTC	TCGAAGTTTTCAAAATAAATCGCTCTGCCA	AGTGGAGGTTTTAGACAATGAAGTAGATAA		TAAATGTTGTTAAAAACAACAAAAAAATAA
>spacer22apis	>spacer22helicoides	>spacer22litorale		>spacer22syrphidicola	>spacer22palmae		>spacer22galli							>spacer74ovipneu	>spacer22ovipneu	>spacer22argini	>spacer22hyosynoviae	>spacer22arthri	>spacer21mobile		>spacer23crinochetorum
AAAATATGAATACAATGCAGACGGAAAAG	TAAACTCTTCTAATCAAGGTCTATCTTTTT	ACTTTTACACTCTTATTAGATTTTGCAGAG		TAATATCATCAACATCACTTGGCATTAAAT	CAATCAACAATGGCAACTTTCTGACTGATG		TTAAAACGAAACGATCGCTCTTGCCCTTTT							ATCTTTATTTTTAATATCTTGTTTTCAATT	TGGAAACCAACTAATGTTTTTGTGCTGTACAATTTCTTACTAGAGTAAAACTTACGATATACATTTTAATAACAACAGTAG	TAACTGAACTTATTCTAGCGAATTGGATTA	ACAAGTAGATATAATTACAATACACAATAC	GGTCACTATAAATAACTTCAATAAAATTTT	GATTAGTAGATAACGTAATTAAAGTAGTAA		ATCGCACAGATGGACCCGAATACCATTAAA
>spacer23apis	>spacer23helicoides	>spacer23litorale		>spacer23syrphidicola	>spacer23palmae		>spacer23galli							>spacer75ovipneu	>spacer23ovipneu	>spacer23argini	>spacer23hyosynoviae	>spacer23arthri	>spacer22mobile		>spacer24crinochetorum
TTATCTTTAAACTACTAATTTGTAAACTAG	TATACTCTATTTTTTTATCTCATGAGATTA	GAGGACAAATAACTTATTTTATAGAAGTTA		CTGTTGATCCTGTTATATATCTATTGCTTGA	CAATCATTTGGCAAGGTGATGAATATGATA		TCCAAATCAGCTGGTTTAACATAGCCCATT							ACTATATTTTGAGTGTCTTCTTTTCCTAAT	ATAGGATAGTATCGTTTTTAAGGTATTTAT	TATATAATTACATCAGAGTTAGGCGGTAAG	ACAAGAGAAAACACCTTTTGAAATTGATAA	ACGAAGCTTTTAAAGAATTGAAATTGATAAA	GACCTTAATGTGCTAACAAATGGACAAATT		ATCGCACAGATGGACCCGAATACCATTAAA
>spacer24apis	>spacer24helicoides	>spacer24litorale		>spacer24syrphidicola	>spacer24palmae		>spacer24galli							>spacer76ovipneu	>spacer24ovipneu	>spacer24argini	>spacer24hyosynoviae	>spacer24arthri	>spacer23mobile		>spacer25crinochetorum
TTTTTTTCAATACATAATTACTTGTTCATAA	TAGTGATAAGTTTTAAAACCTTATCTATAT	TTAGCAAAGATAGTTATCAACCTTTTTTAT		TAACATTTCAAATTGATATTTATCAAATAA	TGCAAAGAGCGATTGAGGCTTTAGAGTTAG		GCGCGATCACAAGATGCATGATACTTTTGA							TTATTTTGTAAATAAAGGTCATTTTAAGTT	CAAATAAAGAAAAATCCCCTTATTGCTTGA	GAGTAACTGAACTTACGCTTATGATATTGA	GGAGTAACAGTATTATAAAAACTATTAAAA	CTTTTTCTCTTTTAGCATCGGAAAAAATAA	ACATTAAACAAATCTAAATTTGCATTTAAA		CCCATAAATATTCAATTAACATTTTAATCT
>spacer25apis	>spacer25helicoides	>spacer25litorale		>spacer25syrphidicola	>spacer25palmae		>spacer25galli							>spacer77ovipneu	>spacer25ovipneu	>spacer25argini	>spacer25hyosynoviae	>spacer25arthri	>spacer24mobile		>spacer26crinochetorum
GACAACTTCGGAATCATCATTATCAGTAGT	TCGGCACTATTCAATGTTTTAATAAAAGTC	CCACCTTCTTTTGGAAATCAACTCATACCG		CCACTTTCAATATATGGAACAACATAAGCA	ATGATACCGCATTAGGAGCATGGAAAGATG		AAAAACCAGAGATAACCGATGGGTTAAAT							TTAAGACATCCGAGGAGGCTTATGAAAAAAGCAT	AAGAAAAAGGACTACCTTTATCAGTTGACC	TAGGCTTTGAAGTGATAAGATATCACAACG	AAGTTGAAGTATTATTAATAAATTTATTAT	ATAACTGTCTAAGTGGTGTTCATTAATATG	CGAATTAAATGCAGAAGTTATTGCAATTAA		ACTTTTGCATATAATGACTTAATTAAAATA
>spacer26apis	>spacer26helicoides	>spacer26litorale		>spacer26syrphidicola	>spacer26palmae		>spacer26galli							>spacer78ovipneu	>spacer26ovipneu	>spacer26argini	>spacer26hyosynoviae	>spacer26arthri	>spacer25mobile		>spacer27crinochetorum
ATCAGTCCGAGAGACTTAAAACAAAGGAGT	ATGTATAGGTGCAGTTTTATGTATTATAGG	ATCATATATTATTTTAGGAATTGCATAGCC		GAAATCTTCAACATAATTATTTATATTTTC	GACTTTTGCAATGAGTATGATTTGAGATTT		CTTATATTCATCATCTTGTTTAGTTTCATA							ATGAATACTACAAGGCAAGACGTAAGAGCAAGTATA	TGATAAAGGTGTATTTGTAATTTGAGACCT	CAACTCTTGTTAGTCCTAACCAAGACGCTTT	TTGATTCACTTTTTAATGATATTTATAATT	TTTCACACTTCTTGTATTGCAGGTGATTTA	GAGTTTCTGACTTTGAGACTATAACAGCGA		TAATTACTTCGCAACTTAATTTTTAAATAA
>spacer27apis	>spacer27helicoides	>spacer27litorale		>spacer27syrphidicola	>spacer27palmae		>spacer27galli							>spacer79ovipneu	>spacer27ovipneu	>spacer27argini	>spacer27hyosynoviae	>spacer27arthri	>spacer26mobile		>spacer28crinochetorum
ATTAAAATTGAAATTAATAATCATATTTGA	CTACATGAGATATCTTCGTGTCTAAATCTT	ATATGAAATCTATCCATTGAAGATTTGAAA		TAAGACCATTGTTTGATCCATATACATCAA	CTAGAAAAGTATATGCTGATGTATATATTG		ATAAATGCGAATAATGTCCTTGTCGAAGAT							AACATTTAGACAAGGGAAGTTTCAAATGCCGTT	TATTTCCAATGCGACGAAATTTTGTCAACC	TTATAACTTAAATTTTCAATTTTATCACCC	TAACAAGATTGAAAAAACATACATTATCAA	AAAACCAGGCCACTATATTTTTATAAAAAT	TGAAACAAGTCCAGTCGATAAAGGAAATGA		ACTTTAATGGTTAATGCATTCATACCACTA
>spacer28apis	>spacer28helicoides	>spacer28litorale			>spacer28palmae									>spacer80ovipneu	>spacer28ovipneu	>spacer28argini	>spacer28hyosynoviae	>spacer28arthri	>spacer27mobile		>spacer29crinochetorum
ACGATTTCGTTCAATAAAAAATTCAATCTA	CATTGAGAGAAAGGGTCTATTTTGTTTAAT	ATTTGTCTAATAAAACATTCATTATTTTAA			TTTAGCATTACCAACATAACCCAAAGAGTT									GGCTCTACCAACAAATTATCACCTATGGCCTATT	TAGTAAAGTCAGAGTCCAACAAATTTCAAA	ATAATCGATATAGCCTAAAAAGCCTGCAAT	TTTTATTCTTTGTTGTGTTATGATTTAGAA	CCAAAGGATTTACAACGGTTTTATATCCTA	CTTCACCATGATAATATTTTGCTAATTCTA		CCTTAGACCATCTACTTTCGCTTATAACGA
>spacer29apis	>spacer29helicoides	>spacer29litorale			>spacer29palmae										>spacer29ovipneu	>spacer29argini	>spacer29hyosynoviae	>spacer29arthri	>spacer28mobile		>spacer30crinochetorum
ATCTATTTCATCCGTCACACTTACCACATT	GCTCTGTTTCTGCTAGTTTTTGGTCTTTTG	ACAAAGAGATACCAAAAATAAAAACCCGAT			GTACATATGACAATCCGTTTGATGGGTACA										ATAACAAAAATGGAAGAAATTGCCAAACGT	TAATTTGCCAATCTTTGCTCCACTCGCGAT	TATTTGTTGCAGCTTTTAATTAGAAAAATA	TCTTAATTCTTTTAAACTGTCTGCTTTGTTGA	TCATTGTATAATCTTTTTTTCAATTTGTAT		ACAGAAATATTATATTTATACGTTCCTTAC
>spacer30apis	>spacer30helicoides	>spacer30litorale			>spacer30palmae										>spacer30ovipneu	>spacer30argini	>spacer30hyosynoviae	>spacer30arthri	>spacer29mobile		>spacer31crinochetorum
ATGGGAGATCCTGATTGAAAGGGGAGTTTA	CTGGGCATTCATTAATATATTTATCTACTT	GTAATGTATATCATATGAGAGATGACAGAT			ACCAAATCTTAGATAACGCGCTTTTATTGT										TCAAAAATGATTGACTATTTAATAAAAGCA	AACACTTGTTAGCCCTAACCAAGACGCTTT	TAAATATTTGGTTAGTACGGAGCTTGGTTC	AATATATAACCTGGATCATTAACAGGTGAG	CAGATCAACCTTATTATAAAAGTGAAATTT		AACGTTAGAGGATTTTACTCAAATGTTAAT
>spacer31apis	>spacer31helicoides	>spacer31litorale			>spacer31palmae										>spacer31ovipneu		>spacer31hyosynoviae	>spacer31arthri	>spacer30mobile		>spacer32crinochetorum
AATAAAGAAATAGTAAAAATTGAAATTATA	TAAGTGTCTTCCATGTATTGTTTGTCAAAA	CCAATTCCAGAAATAATTGACATTGCACCT			GTACATATGACAATCCGTTTGATGCGTACA										ATTATTAATTATTTTGGCTTCGTTTGCTTC		ATAACTATGATAGAACTTCTTCTCAATTAA	TTTTGCCACAAAACTACAGGAGCTTTTGTT	TAGAATAGGTTAAACCCAGTCTGCTTAATA		ACATTTACACTAACTGATGATTATACTAATT
>spacer32apis	>spacer32helicoides	>spacer32litorale			>spacer32palmae										>spacer32ovipneu		>spacer32hyosynoviae	>spacer32arthri	>spacer31mobile		>spacer33crinochetorum
CAAAAACATTGAATTTGAGCATTGGTCTTG	ATCACAAGTGTGGAACTTATTTAAGTACAA	CATGTCTAGCAACATTTACATATGTTACGT			CAATCAACAATGGCAACTTTCTGACTGATG										CCGAACATCGACTTATTTTAGTTTCGTT		AAAGATATACTTTTAAAAATTTGAAATACT	TTTTTCATTGCTACTCTAATTGGGTTTGCC	CCCACAATTTATTACAAGAAATAATAAACA		ATAGAGTTTATGTTTAACTGAGAAGACAAT
>spacer33apis	>spacer33helicoides	>spacer33litorale			>spacer33palmae										>spacer33ovipneu		>spacer33hyosynoviae	>spacer33arthri	>spacer32mobile		>spacer34crinochetorum
CAGTATTTAAAACGCAATATTTTTCCCATA	TTGGTATAGTGAAATAGTCTTCTAAAACCT	GCAACTTATCTATAATTATCTTAAAATAAA			CAATCATTTGGCAAGGTGATGAATATGATA										TATGCTCTGCCTAAGGAATTCAAAGCAGAA		CCAATGCTATTGATTATAATCCTGCTATGA	ATTTAGGATTGTATTTTTGAACTGTCCCTAA	ATATATTATTATACTATCAAAATAATACAT		ATACCGCCTCAATTAGATTGATTGGTATAT
>spacer34apis	>spacer34helicoides	>spacer34litorale			>spacer34palmae										>spacer34ovipneu		>spacer34hyosynoviae		>spacer33mobile		>spacer35crinochetorum
AAGTTTTTTTCGTCAACCTTCAAGTCTTTC	GAGCTAGGTTTGGAAGCCAACTAATTTTAA	CAAACAACTTTTAAAATAAATTTTGTTTTA			ACATGAAAGCAAACGATGTAACCATATTTA										TTTAGCGCTACTAAACAGGTGAGATACTTA		ATGGTTGTGAATCGTATTTAGTAGTATTGA		AATATTAGAGCAGTAAAATTAAGTATTTAT		CTTCTTTTAACAGAATCAAATATTTTTTTT
>spacer35apis	>spacer35helicoides	>spacer35litorale			>spacer35palmae										>spacer35ovipneu		>spacer35hyosynoviae		>spacer34mobile
TAATAAGTTATATTTCTTAGCTAAAGATGG	CTATTCCTAATTGACTAAAACCTAGTGCTT	AGCAAAAGAAATTATAGCAATTATTTTTCA			TGAATAATATGTGTTTGGTTCAACCATATC										TGTTTTTGTGCTGTACAATTTCTTACTAGAGTATAAAACTATGCTCTGCCTAAGGAATTCAAAGCAGAA		CTAGTGCTATTGATTATAATCCTGCTATGA		AGTATTAACTCCTGTAATTCTAATTAAATG
>spacer36apis	>spacer36helicoides	>spacer36litorale			>spacer36palmae										>spacer36ovipneu		>spacer36hyosynoviae		>spacer35mobile
GAACCTATTAAAAATAGTACAACTAATAGA	TAACAATCACATTAGGATTTGAATTTGATA	ATCCTTTATGAATGTTTTTGTTAGTATAGA			AAGAAGTGGCAGATGAATAACCACTCCTAA										ATGATATAAAGTATAATTCTAGTACTGAC		TTAACGCTATTGATTATAATCCTGGTATGA		AAGAGCAATTGATTTAAGAATTTTCCAACC
>spacer37apis	>spacer37helicoides				>spacer37palmae										>spacer37ovipneu				>spacer36mobile
TCAATAGTTAGTTTCTCAACGAACTCTTTT	ACAACTCACCCAAGGCCTTTTGTTTTTTAT				CAATCATTTGGCAAGGTGATGAATATGATA										CTTTTGGATTTTCAGGAATGAGAGTGACTT				ATGCACACACTGACACCATAATATAAAAAT
>spacer38apis	>spacer38helicoides				>spacer38palmae										>spacer38ovipneu				>spacer37mobile
TTTTTCATTAACTAATATTTTTATTGGTTG	GACAGTACAGTGAATTCAATTTATGACATG				ACATGAAAGCAAACGATGTAACCATATTTA										CCGAACATCGACCCGGTCACCGGAACTAAA				CTTCACCGTGATAATAAGACGTTAATTCGA
>spacer39apis	>spacer39helicoides				>spacer39palmae										>spacer39ovipneu				>spacer38mobile
TCGTAAATTGTTCGTTATAAGTCTTCATTT	AATAAGCCACTATCAATTAAACCAATCTCG				TGAATAATATGTGTTTGGTTCAACCATATC										TAATATCTCCGGTTGCTGATATTCAAGAAC				AATATCTTCTCTTGTTGTATATCATTCGTC
>spacer40apis	>spacer40helicoides				>spacer40palmae										>spacer40ovipneu				>spacer39mobile
GATTTTATGTACAACGAAATGGAAATTAGT	TAACCAACAAAATAAGTAATTTACAAAGTA				AAGAAGTGGCAGATGAATAACCACTCCTAA										AGATTAGTGAACTTAATGTTGAGGACGGAA				ATATTATAGTTAGTAGTTTCTTCTTTATTC
>spacer41apis	>spacer41helicoides				>spacer41palmae										>spacer41ovipneu				>spacer40mobile
TCAACAAAAGTCTTATCATATGGCATTCAA	CAGAGGATATTGTGAATAACTATGGTGGTA				TGAATAATATGTGTTTGGTTCAACCATATC										AAATATTTATAATTTTAAAATCAAACACTT				AGAGTGATTATACGCTCACTTCAAAATTAA
>spacer42apis	>spacer42helicoides				>spacer42palmae										>spacer42ovipneu				>spacer41mobile
CAAAACACAGACCCTACGATCAAGTACAAA	AAAAGTATTTTTTTTTATTTTTACTCTTAC				AAGAAGTGGCAGATGAATAACCACTCCTAA										ATCCAAAACGGCAAAGAAAAGTGAGTCATA				GAATGATAATAACTATATCTGCTTTTTGCT
>spacer43apis	>spacer43helicoides				>spacer43palmae										>spacer43ovipneu				>spacer42mobile
GTCATTGAAAAACTTTTATTAGAGGTAATT	CATTATAAATTTTTTGTTCTATCTGGTCCG				TTCTCATCAAAAAGCGTTGCACTATTCTA										TGACAGGGTGGAGAGTCAAACCCTAAGTAC				TTATATGCGCCTGCTTTTCCATGGAAAAAG
>spacer44apis	>spacer44helicoides				>spacer44palmae										>spacer44ovipneu				>spacer43mobile
GGTTCATAGCTTTTGAACAACCACAACTTT	AGTTCTAGTTCAAATTCACACTTAGATTTT				CCATGTCTTACTCCGTTTCTATCTCAATTC										GGTTGAGTTTAAAAAATGAGGTTTTAGTCT				ATGGTATCAGGTGATAGTAAAATAGTAGAA
>spacer45apis					>spacer45palmae										>spacer45ovipneu				>spacer44mobile
ACTTGCTGAAGGCTTTGACCAAGGTACGGG					AAACAAAATGTTATCAAAAGTTAAAGCATT										TTAAATGGACGATATAGCAAGCATTCTAGC				TACTGGATTTGAATTAAATTTTGATGACGG
>spacer46apis					>spacer46palmae										>spacer46ovipneu				>spacer45mobile
GTATTGACATACATATTTTTTACCTATAAG					CAGAACTCATGAACTTACCAGATGGACTTA										AAAAGTGCCTTCTGCTTTTTATTAAGGGGGG				CAATGCAACACTATTTGGAAAATGATTTAA
>spacer47apis					>spacer47palmae										>spacer47ovipneu				>spacer46mobile
TTTTTTTCATTTTAAAACCTTTCCATTTCT					TCTATATTTAGATATGTAAGTCAATGCTT										AGTGAATATGTGTGATATCGTGAAGAGTGGT				GGTAATGATTCAGGCTCTATTTGATAGATT
>spacer48apis															>spacer48ovipneu				>spacer47mobile
TTTTTCATTAACTAATATTTTTATTGGTCA															TACAAAAGCGGACTTTTAATGGTATTTTTA				AGACTCAAGCACCAATAGATTCAGTATTAA
>spacer49apis															>spacer49ovipneu				>spacer48mobile
ACATTTTCGTTCAATAAAAAATCCAATCTA															CAAATTTTAATAAAGTACTAAATGCCATAA				TAAAAGAAAGAGAGTTATACTCTCTTTCTT
>spacer50apis															>spacer50ovipneu				>spacer49mobile
AGTGAAAACAAAGTATCCGCATCTATTTGA															TTAGTTTTTAAATATTCAATATGAGTATTT				GCTGACTGTTCTTTGTTGTTTGTTTCATTT
>spacer51apis															>spacer51ovipneu				>spacer50mobile
GGACCAATATATACCTATTTCCCCGACAAC															TTGAAATTTACAGGATTACTACAAGGGTCA				ATTCTGCCCAACTAATAAATCAAAAAAATA
>spacer52apis																			>spacer51mobile
GCAATAAGCATTTTTACATCATGTTAGGGGTT																			TGTCTGTATCTAAATAATAAACATTTTTTC
>spacer53apis																			>spacer52mobile
AACAAGATCAAGTATCTTATACAACCTATA																			GCACTGTCTGCAAGCTTTGCTTATGTAGCT
>spacer54apis																			>spacer53mobile
TTAGATTTAAATAATTACGAAACAAATAAT																			TCACGAAGTTTTATGAAAAGAAATTGAAAA
>spacer55apis																			>spacer54mobile
AAGATTGAGAGTAACAAGGAGTTGGAGATT																			CTAATTTATCAAATGAAATTGTTAATTTAT
																			>spacer55mobile
																			CCTACGCTTGCAACTTTTAAATTCGTCATA
																			>spacer56mobile
																			ATAGGTCAGATTTTTTCTAATGCACCCTTT
																			>spacer57mobile
																			TGATTATATAAGAGAGCACCAAAATGCTTA
																			>spacer58mobile
																			ATATATTATTTTAATGGTAATTTAATACAT
																			>spacer59mobile
																			ACAAAATTGTAAATAATAAATTATTACTTG
																			>spacer60mobile
																			TGAAACATCATTTATATTATCTGAACAAGA
																			>spacer61mobile
																			TCTAAACTTATCAGCAAACCACATTTATCA
